1 MLL1 is required for maintenance of intestinal stem cells and the  
2 expression of the cell adhesion molecule JAML

3

4 Neha Goveas<sup>1</sup>, Claudia Waskow<sup>2,#a,#b</sup>, Kathrin Arndt<sup>2</sup>, Julian Heuberger<sup>3,#c</sup>,  
5 Qinyu Zhang<sup>1</sup>, Dimitra Alexopoulou<sup>4</sup>, Andreas Dahl<sup>4</sup>, Walter Birchmeier<sup>3</sup>,  
6 Konstantinos Anastassiadis<sup>5</sup>, A. Francis Stewart<sup>1,6\*</sup>, Andrea Kranz<sup>1\*</sup>

7

8 <sup>1</sup> Genomics, Center for Molecular and Cellular Bioengineering, Biotechnology  
9 Center, Technische Universität Dresden, Dresden, Germany

10 <sup>2</sup> Institute for Immunology and Department of Medicine III, Technische  
11 Universität Dresden, Dresden, Germany

12 <sup>3</sup> Laboratory of Signal Transduction in Development and Cancer, Max  
13 Delbrück Center for Molecular Medicine, Berlin, Germany

14 <sup>4</sup> DRESDEN-concept Genome Center, Center for Molecular and Cellular  
15 Bioengineering, Technische Universität Dresden, Dresden, Germany

16 <sup>5</sup> Stem Cell Engineering, Center for Molecular and Cellular Bioengineering,  
17 Biotechnology Center, Technische Universität Dresden, Dresden, Germany

18 <sup>6</sup> Max Planck Institute of Molecular Cell Biology and Genetics, Dresden,  
19 Germany

20

21 <sup>#a</sup>Current Address: Regeneration in Hematopoiesis, Leibniz-Institute on  
22 Aging, Fritz-Lipmann-Institute (FLI), Jena, Germany

23 <sup>#b</sup>Current Address: Institute of Biochemistry and Biophysics, Faculty of  
24 Biological Sciences, Friedrich-Schiller-Universität Jena, Jena, Germany

25 #<sup>c</sup>Current Address: Department of Hepatology and Gastroenterology, Charité

26 University Medicine, Berlin, Germany

27

28 \* Corresponding authors

29 E-mail: [francis.stewart@tu-dresden.de](mailto:francis.stewart@tu-dresden.de) (AFS)

30 E-mail: [andrea.kranz@tu-dresden.de](mailto:andrea.kranz@tu-dresden.de) (AK)

31

## 32 **Abstract**

33

34 Epigenetic control is crucial for lineage-specific gene expression that creates  
35 cellular identity during mammalian development and in adult organism.

36 Histone 3 lysine 4 methylation (H3K4) is a universal epigenetic mark. Mixed  
37 lineage leukemia (MLL1) is the founding member of the mammalian family of  
38 H3K4 methyltransferases. It was originally discovered as the main gene

39 mutated in early onset leukemias and then found to be required for

40 hematopoietic stem cell development and maintenance. However, the roles of

41 MLL1 in non-hematopoietic tissues remain largely unexplored. To bypass

42 hematopoietic lethality, we used bone marrow transplantation and conditional

43 mutagenesis to discover that the most overt phenotype in *Mll1*-mutant mice is

44 intestinal failure. Loss of MLL1 is accompanied by a differentiation bias

45 towards the secretory lineage with increased numbers of goblet cells. MLL1 is

46 expressed in intestinal stem cells (ISCs) and transit amplifying (TA) cells but

47 at reduced levels in Paneth cells and not in the villus. MLL1 is required for the

48 maintenance of intestinal stem cells (ISCs) and proliferation in the crypt.

49 Transcriptome analysis implicate MLL1-dependent expression in ISCs of

50 several transcription factors including *Pitx2*, *Gata4*, *Foxa1* and *Onecut2*, and

51 also a cell adhesion molecule, *Jaml*. Reactive transcriptome changes in

52 Paneth cells and organoids imply that JAML plays a key role in the crypt stem

53 cell niche. All known postnatal functions of MLL1 relate to stem cell

54 maintenance and lineage decisions thereby highlighting the suggestion that

55 MLL1 is a master stem cell regulator.

## 56 **Author Summary**

57

58 The ability of adult stem cells to produce functional progenies through  
59 differentiation is critical to maintain function and integrity of organs. A  
60 fundamental challenge is to identify factors that control the transition from self-  
61 renewal to the differentiated state. Epigenetic factors amongst others can  
62 fulfill such a role. Methylation of histone 3 on lysine 4 (H3K4) is a  
63 posttranslational epigenetic modification that is associated with actively  
64 transcribed genes. In mammals, this epigenetic mark is catalyzed by one of  
65 six H3K4 methyltransferases, including the founding member of the family,  
66 MLL1. MLL1 is important for the precise functioning of the hematopoietic stem  
67 cell compartment. This raises the possibility of similar functions in other adult  
68 stem cell compartments. Due to its intense self-renewal kinetics and its simple  
69 repetitive architecture, the intestinal epithelium serves as a prime model for  
70 studying adult stem cells. We demonstrate that MLL1 controls intestinal stem  
71 cell proliferation and differentiation. Additionally, transcriptome analysis  
72 suggests a perturbation in the close interaction between intestinal stem cells  
73 and neighbouring Paneth cells through loss of junction adhesion molecule like  
74 (JAML). Our work sheds new light on the function of MLL1 for the control of  
75 intestinal stem cell identity.

76

## 77 **Introduction**

78

79 Stem cells are cornerstones of tissue biology, ensuring homeostasis  
80 and regeneration in many organs, including epithelial tissues such as skin,  
81 intestine and mammary gland [1]. Stem cells are characterized by  
82 multipotency, which is the ability to differentiate into a restricted number of  
83 defined cell types, and self-renewal, which is the capacity to undergo infinite  
84 replicative cycles without losing stem cell identity [2]. The remarkable  
85 capacities of stem cells, particularly the restricted specificities of multipotency,  
86 rely on interplays between specific transcription factors and distinct epigenetic  
87 landscapes. Whereas the transcription factors involved in stem cell  
88 maintenance and differentiation have been clearly defined, epigenetic  
89 contributions are proving more elusive. For example, the transcription factor  
90 hierarchies in the stem cell paradigm, hematopoiesis, have been elegantly  
91 dissected [3]. However the contributions of DNA and histone  
92 methyltransferases to hematopoiesis are still emerging and indicate both  
93 specificities and the deeper complexities of epigenetic regulation[4-8].

94 Methylation of histone 3 on lysine 4 (H3K4) is one of the most  
95 conserved and widespread epigenetic systems [9]. H3K4 is methylated in  
96 euchromatic regions, with trimethylated H3K4 (H3K4me3) on nucleosomes  
97 surrounding active promoters, H3K4me2 marking transcribed regions and  
98 H3K4me1 relating to enhancers and active chromatin in general [10-14].  
99 Mammals have six Set1/Trithorax-related methyltransferases that are  
100 encoded by three pairs of paralogous sister genes namely, *Mll1* (*Kmt2a*) and  
101 *Mll2* (*Kmt2b*), *Mll3* (*Kmt2c*) and *Mll4* (*Kmt2d*), *Setd1a* (*Kmt2f*) and *Setd1b*

102 (*Kmt2g*). Each of the six methyltransferases reside in their own, large, protein  
103 complex. However all six complexes are based on a four membered scaffold  
104 termed WRAD for the subunits WDR5, RBBP5, ASH2L and DPY30 [15].  
105 Functional differences between the six complexes potentially arise from the  
106 presence of additional subunits, which are usually shared by paralogous pairs  
107 or sometimes uniquely found in one of the six complexes.

108 Mixed lineage leukemia (*MLL1*) was the first mammalian gene  
109 identified as a Trithorax homologue and subsequently found to encode a  
110 mammalian Set1/Trithorax-type H3K4 methyltransferase (HMT) [16, 17]. In  
111 mice, *MLL1* is first required at embryonic day 12.5 (E12.5) for definitive  
112 hematopoiesis [18, 19] and also required for the maintenance of adult  
113 hematopoietic stem cells (HSCs) [20, 21]. *MLL1*, but not its paralogue, *MLL2*,  
114 is a proto-oncogene because it can be activated by chromosomal  
115 translocations to promote leukemias without additional mutagenesis [22, 23].  
116 Over 80 translocation partners have been identified including AF6 and AF9  
117 [24]. Notably, *MLL1-AF6* and *-AF9* leukemias rely on *Mll2* expression [6].  
118 Mouse studies also indicated that *MLL1-AF9* leukemogenesis is entirely  
119 conveyed by overexpression of *Hoxa9* [25]. Conditional mutagenesis has also  
120 revealed *MLL1* functions in satellite cells [26] and postnatal neural stem cells  
121 (NSCs) [27]. These observations raise the possibility that *MLL1* regulates  
122 specific functions in stem cell compartments.

123 Due to its high turnover and hierarchical architecture, intestinal stem  
124 cells (ISCs) in the intestinal epithelium have become an adult stem cell  
125 paradigm. ISCs have been identified as either actively cycling crypt base  
126 columnar cells (CBCs) or quiescent label-retaining cells (LRCs) located at the

127 +4 position from the crypt base [28]. Leucine-rich repeat-containing G protein-  
128 coupled receptor 5 (LGR5) is one of the best-characterized markers for the  
129 CBC class ISCs [29]. They generate transit amplifying (TA) daughter cells that  
130 give rise to the terminally differentiated progenies: absorptive enterocytes,  
131 secretory goblet, enteroendocrine and Paneth cells [30]. Except for Paneth  
132 cells, these cell types take 3 to 5 days to migrate up the villi and are shed into  
133 the intestinal lumen. Paneth cells reside at the base of the crypts in close  
134 association with ISCs and turn over at a slower rate [30].

135         The quiescent LRCs are active only during stress or injury. They  
136 represent a stem cell reserve to replace damaged ISCs [31]. Enterocytes,  
137 preterminal enteroendocrine cells, goblet cell precursors and Dll1<sup>+</sup> secretory  
138 progenitors are also notable for their plasticity and can serve as a reservoir for  
139 lost stem cells [32, 33] [34]. Mature Paneth cells also show an injury-activated  
140 conversion to a stem cell like state [35]. Together with new perceptions in  
141 hematopoiesis [4, 6, 36], the dynamic plasticity of the intestinal crypt has  
142 expanded the stem cell paradigm [37], especially during replenishment after  
143 damage or inflammation.

144         To examine whether MLL1 plays additional roles in the adult, we  
145 employed ligand-induced conditional mutagenesis using a tamoxifen-inducible  
146 *Rosa26-CreERT2* line (RC) for near-ubiquitous Cre recombination to discover  
147 that MLL1 is required for the maintenance of the ISC compartment and the  
148 balance between secretory and absorptive cell lineages in the adult intestine.

## 149 **Results**

150

### 151 **Intestinal functions collapse after loss of MLL1 in adult mice**

152 To explore MLL1 functions, we utilized a multipurpose allele that can  
153 be converted from one state to another using FLP and Cre recombination  
154 (S1A-S1C Figs) [38, 39]. Homozygous embryos carrying the targeted allele,  
155 *Mll1<sup>A/A</sup>*, developed normally until E12.5 when they displayed pallor of the liver  
156 and were smaller (S1D Fig). After E13 no live *Mll1<sup>A/A</sup>* embryos were found (S1  
157 Table). After FLP and Cre recombination, *Mll1<sup>FC/FC</sup>* embryos displayed the  
158 same phenotype indicating that both A and FC are true null alleles in  
159 concordance with the loss of MLL1 protein [40]. Furthermore the *Mll1<sup>A/A</sup>* and  
160 *Mll1<sup>FC/FC</sup>* phenotype recapitulated another likely null allele [6] with all three  
161 homozygous mice presenting the same embryonic lethality due to the failure  
162 to engage definitive hematopoiesis [20].

163 To identify postnatal roles of MLL1, conditional mutagenesis using  
164 *Rosa26-CreERT2* was applied to 2 month old adults. As expected, mice  
165 lacking MLL1 developed severe bone marrow cytopenia and died or had to be  
166 sacrificed on average within two weeks (Figs 1A and 1B). As previously  
167 reported using the same conditional allele, *in vitro* deletion of *Mll1* in KSL-  
168 enriched HSCs from *Mll1<sup>F/F; RC/+</sup>* mice resulted in significant downregulation of  
169 *Hoxa9*, *Meis1*, *Mecom/Evi1* and *Prdm16* [6].

170 To bypass the bone marrow related lethality and thereby uncover non-  
171 hematopoietic phenotypes, bone marrow from wild type (wt) B6.SJL mice was  
172 transplanted into lethally irradiated *Mll1<sup>F/+; RC/+</sup>* or *Mll1<sup>F/F; RC/+</sup>* mice. After stable  
173 engraftment tamoxifen gavage induced widespread Cre-mediated excision of



174 *Mll1* (Fig 1C). Examination of the bone marrow confirmed the successful and  
175 near-complete reconstitution of the hematopoietic stem cell compartment by  
176 wt donor cells. FACS analysis for KSL-Slam enriched hematopoietic stem  
177 cells showed comparable frequencies in bone marrow transplanted (BMTx)  
178 *Mll1<sup>FC/+; RC/+</sup>* and *Mll1<sup>FC/FC; RC/+</sup>* mice with the hematopoietic compartment  
179 comprised only of wt cells of CD45.1 origin (Fig 1C). Notably, the BMTx  
180 *Mll1<sup>FC/FC; RC/+</sup>* mice suffered from diarrhea and wasting (Fig 1D). These data  
181 indicate that MLL1 is not only required in the hematopoietic compartment but  
182 also elsewhere and this additional requirement is similarly critical for survival  
183 as the hematopoietic requirement.

184 The small and large intestine harbor their stem cell compartments at  
185 the base of the crypt. MLL1 is strongly expressed at the crypt bottom and in  
186 the TA compartment whereas it is absent in differentiated cells above the TA  
187 compartment (Figs 1E and S1E). RNA profiling of sorted ISCs and Paneth  
188 cells confirmed expression of *Mll1* and the other family members in both cell  
189 types however more strongly in ISCs (S1F Fig). In the mutant small intestine  
190 of BMTx *Mll1<sup>FC/FC; RC/+</sup>* mice, expression of MLL1 was efficiently ablated (Fig  
191 2A). Loss of stem cell markers olfactomedin (OLFM4) and SOX9 suggested  
192 depletion of ISCs in the small intestine of BMTx *Mll1<sup>FC/FC; RC/+</sup>* mice (Fig 2A).  
193 Consistent with this, the mutant showed decreased proliferation in the crypt as  
194 demonstrated by strongly reduced expression of the mitotic marker Ki67 (Fig  
195 2A). However, the intestinal epithelium of *Mll1<sup>FC/FC; RC/+</sup>* mice revealed no  
196 apparent change in global H3K4 mono-, di- and trimethylation (S1G Fig).

197 Shortened villi with distorted morphology including vacuolar structures  
198 at the tip indicated diminished replenishment of cells into the villus (Fig 2B).

199 Furthermore we observed increased numbers of enlarged goblet cells  
200 distributed irregularly along the villus and also ectopically in the crypt (Fig 2B).  
201 However, Paneth cells appeared unchanged possibly due to their longer life  
202 span (Fig 2C). Similarly, as evaluated by chromogranin A and alkaline  
203 phosphatase, the enteroendocrine and absorptive lineages appeared to be  
204 unaffected (Fig 2C).

205 Without bone marrow rescue, *Mll1*<sup>FC/FC; RC/+</sup> mice showed the same  
206 defects with depletion of ISCs, decreased proliferation and a distortion of the  
207 secretory lineage (S2A-S2C Figs). Differentiation into the enteroendocrine  
208 and absorptive lineage was also apparently unaffected (S2D Fig). Notably the  
209 hallmark of Wnt signalling, nuclear  $\beta$ -catenin, was also unaffected (S2E Fig).

210

## 211 **Intestinal epithelium-specific *Mll1* conditional mutagenesis recapitulates** 212 **ubiquitous deletion**

213 To delete *Mll1* exclusively in the adult intestine we employed the  
214 tamoxifen-inducible gut epithelium-specific *Villin-CreERT2* strain [41]. After  
215 tamoxifen administration *Mll1*<sup>FC/FC; Vil-CreERT2/+</sup> mice lost weight compared to  
216 control mice (Fig 3A). In agreement with our observations after ubiquitous  
217 deletion of *Mll1*, OLFM4, SOX9 and proliferation were markedly decreased,  
218 goblet cells were increased whereas Paneth and enteroendocrine cell  
219 numbers were unchanged (Figs 3B and 3C).

220

## 221 **Transcriptome analysis identifies key intestine specific transcription** 222 **factors and *Jaml* as central to the crypt stem cell niche**

223 For transcriptome analysis, ISCs and Paneth cells were isolated 4 and

224 10 days after tamoxifen administration from *Mll1*<sup>FC/+</sup>; *Lgr5-eGFP-CreERT2/+* and  
225 *Mll1*<sup>FC/FC</sup>; *Lgr5-eGFP-CreERT2/+* littermates (S3 Fig). Using 75 base-pair reads, 20-  
226 37 million reads per sample with high levels of uniqueness (70-77% in *Lgr5*<sup>+</sup>  
227 ISCs and 60-76% in Paneth cells; S4A-S4C Figs) and comparable  
228 mappability (99%) were obtained. Principal component analysis (PCA)  
229 revealed that our datasets are in good agreement with published datasets  
230 obtained from sorted ISCs and Paneth cells [35, 42] (S4D Fig).

231 We applied DESeq2 to analyze differentially expressed genes (DEGs).  
232 For the 4 day *Lgr5*<sup>+</sup> stem cell profile, only 87 and 49 genes were up- or  
233 downregulated at a 5% false discovery rate (FDR) after removal of MLL1 (Fig  
234 4A, Supplementary excel file 1). However, none of the upregulated transcripts  
235 were increased by more than log2-fold and by DAVID analysis were mainly  
236 related to diverse terms such as 'response to metal ion', 'organic acid  
237 metabolic process' and 'regulation of lipid metabolic process' (Fig 4B). In  
238 contrast the most significant terms associated with the downregulated mRNAs  
239 were 'regulation of gene expression', 'epithelial cell differentiation' and 'cell  
240 proliferation' (Fig 4B). The 10 day profile revealed 179 DEGs, of which 105  
241 were upregulated, 74 were downregulated with significant overlaps to the 4  
242 day profile (Supplementary excel file 1, Table 1).

243

244  
245

**Table 1. Downregulated mRNAs common to both 4 and 10 day stem cell profiles.**

| Gene                                  |                                       | 4d C   | KO     | FC          | 10d C  | KO    | FC          |
|---------------------------------------|---------------------------------------|--------|--------|-------------|--------|-------|-------------|
| <i>Jaml/Amica1</i>                    | Junction Adhesion Molecule Like       | 4124   | 119,9  | <b>34,4</b> | 3779   | 113,4 | <b>33,3</b> |
| <i>Pitx2</i>                          | Paired Like Homeodomain 2             | 1399,6 | 162,9  | <b>8,6</b>  | 854,8  | 34,7  | <b>24,6</b> |
| <i>Far1</i>                           | FattyAcyl-CoA Reductase 1             | 402,3  | 229,1  | <b>1,8</b>  | 231,8  | 47,4  | <b>4,9</b>  |
| <i>Foxa1/Hnf3<math>\alpha</math></i>  | Forkhead Box A1                       | 356,8  | 105    | <b>3,4</b>  | 428,4  | 93,9  | <b>4,6</b>  |
| <i>Onecut2/Hnf6<math>\beta</math></i> | Onecut Homeobox 2                     | 2334,5 | 1177,1 | <b>2,0</b>  | 2411,9 | 583   | <b>4,1</b>  |
| <i>Gata4</i>                          | GATA Binding Protein 4                | 676,4  | 356,9  | <b>1,9</b>  | 508,2  | 136,7 | <b>3,7</b>  |
| <i>Ces2g</i>                          | Carboxyl esterase 2                   | 275,2  | 177    | <b>1,6</b>  | 209,9  | 58,6  | <b>3,6</b>  |
| <i>Pla2g2a</i>                        | Phospholipase A2 group IIA            | 291,3  | 119    | <b>2,5</b>  | 215,7  | 68,2  | <b>3,2</b>  |
| <i>Hspa8</i>                          | Hsp 70 family                         | 12104  | 4655,8 | <b>2,6</b>  | 7654,5 | 25856 | <b>3,0</b>  |
| <i>E230029C05</i>                     | ncRNA                                 | 221,9  | 115,8  | <b>1,9</b>  | 203,4  | 70,9  | <b>2,9</b>  |
| <i>Casc4</i>                          | Cancer Susceptible 4                  | 120,5  | 61,4   | <b>2,0</b>  | 255,1  | 93,9  | <b>2,7</b>  |
| <i>Anpep</i>                          | Alanyl amino peptidase N              | 855,8  | 562,5  | <b>1,5</b>  | 393,1  | 150,8 | <b>2,6</b>  |
| <i>Defa29</i>                         | Defensin $\alpha$ 29                  | 859,4  | 556,3  | <b>1,5</b>  | 860,3  | 336,2 | <b>2,6</b>  |
| <i>Lyz1</i>                           | Lysozyme                              | 10861  | 7181,7 | <b>1,5</b>  | 8334,4 | 3429  | <b>2,4</b>  |
| <i>Defa3</i>                          | Defensin $\alpha$ 3                   | 342,6  | 239,5  | <b>1,4</b>  | 521,2  | 214,7 | <b>2,4</b>  |
| <i>Lcp1</i>                           | Lymphocyte Cytosolic P1               | 824,4  | 576    | <b>1,4</b>  | 662    | 291   | <b>2,3</b>  |
| <i>Defa35</i>                         | Defensin $\alpha$ 35                  | 831,4  | 555,4  | <b>1,5</b>  | 938,4  | 431,4 | <b>2,2</b>  |
| <i>Gm10925</i>                        | pseudogene?                           | 18872  | 14115  | <b>1,3</b>  | 30453  | 14252 | <b>2,1</b>  |
| <i>Afap111</i>                        | Lnc-Afap1/1                           | 485,5  | 354,5  | <b>1,4</b>  | 420,6  | 197   | <b>2,1</b>  |
| <i>Phlpp1</i>                         | PH Domain Leucine Rich Phosphatase    | 468,7  | 302,8  | <b>1,6</b>  | 480,5  | 227   | <b>2,1</b>  |
| <i>Fap1</i>                           | Familial Adenomatous Polyposis 1      | 990,5  | 768,4  | <b>1,3</b>  | 1459,8 | 690,9 | <b>2,1</b>  |
| <i>Casp6</i>                          | Caspase 6                             | 4727,6 | 3356,6 | <b>1,4</b>  | 3861,6 | 1835  | <b>2,1</b>  |
| <i>mt-Atp6</i>                        | Mitochondrial encoded ATP Synthase S6 | 49048  | 40226  | <b>1,2</b>  | 61873  | 29894 | <b>2,1</b>  |
| <i>Fam149a</i>                        | Toll-like receptor 3?                 | 170,7  | 97,6   | <b>1,8</b>  | 193,9  | 94,3  | <b>2,1</b>  |
| <i>Zfpm1</i>                          | FOG1 (Friend of Gata 1)               | 198,5  | 146    | <b>1,4</b>  | 216,6  | 106,2 | <b>2,0</b>  |

246 mRNAs expressed more than 150 reads in wt and downregulated more than 2  
247 fold in the 10 day profile are shown. FC, fold change.

248

249 Gene set enrichment analysis (GSEA) of both 4 and 10 day ISC

250 profiles revealed that overall ISC signature genes were downregulated  
251 whereas goblet cell signature genes were upregulated (Figs 4C-4G; S5A and  
252 S5B Figs), which concords with our immunohistochemical analyses. We  
253 focused on the overlap between the 4 and 10 day downregulated mRNAs.  
254 The transcription factors *Pitx2*, *Foxa1*, *Onecut2* and *Gata4* are prominent  
255 (Table 1; Fig 4E). The expression of *Foxa1* and *Pitx2* and was evaluated by  
256 qRT-PCR and good agreement to the RNA-sequencing mRNA reads was  
257 found (S5C Fig). These data suggest a role for MLL1 in maintaining the  
258 transcriptional identity of ISCs.

259         However the top downregulated gene in both stem cell profiles (34.7  
260 and 33.3 fold down) was junction adhesion molecule like (*Jaml* or *Amica1*;  
261 Figs 4A, 4F, S5C) previously identified as an ISC signature gene [43, 44]. It is  
262 highly expressed in Lgr5<sup>+</sup> ISCs, where it appears to rely completely on MLL1,  
263 but not in Paneth cells (at least 55 fold lower expressed in Paneth cells; S5D  
264 Fig). JAML is a 65 kDa type I transmembrane glycoprotein in the JAM subset  
265 of the immunoglobulin superfamily. JAML mediates adhesion of monocytes to  
266 endothelial cells and neutrophil migration across epithelial cell monolayers  
267 through interaction with Coxsackie and adenovirus receptor (CXADR or CAR)  
268 in tight junctions [45]. However, the cognate receptor in the intestinal  
269 epithelium is unknown. Notably the transcript for CAR-like soluble protein  
270 (*Clsp*) (GM1123) is upregulated in both 4 and 10 day profiles (Supplementary  
271 excel file 1). CLSP is closely related to CXADR however it lacks a  
272 transmembrane domain [46].

273

274 **Loss of MLL1 in ISCs provokes transcriptional changes in Paneth cells**

275           ISCs are anchored in the crypt in close association with Paneth cells.  
276 In order to elucidate whether the transcriptional changes in ISCs influenced  
277 the neighboring Paneth cells, we also analyzed Paneth cell transcriptional  
278 profiles 4 days after deletion of *Mll1* in *Lgr5*<sup>+</sup> ISCs, with 198 and 72 transcripts  
279 up- and downregulated respectively (Fig 5A, Supplementary excel file 1). The  
280 most significant terms associated with downregulated mRNAs relate to  
281 perturbation of protein folding and homeostasis in the endoplasmic reticulum  
282 (Figs 5B-5D). In contrast upregulated mRNAs associate with metabolic  
283 changes. Strikingly, transcripts of genes belonging to all five of the respiratory  
284 chain complexes were upregulated (Figs 5B-5D). Paneth cells normally run on  
285 glycolysis with lactate as the end product whereas ISCs depend on  
286 mitochondrial oxidative phosphorylation [47]. These transcriptional changes  
287 suggest that loss of MLL1 in the stem cell compartment provokes changes in  
288 Paneth cells and indeed expression of Paneth cell marker genes was  
289 downregulated (Figs 5C and 5D).

### 290 **Skewed differentiation of organoids after loss of MLL1**

291           To evaluate the cell-intrinsic requirement of MLL1 in the small intestine,  
292 we isolated crypts from *Mll1*<sup>F/+; RC/+</sup> and *Mll1*<sup>F/F; RC/+</sup> mice and cultured them to  
293 form organoids. After passaging, organoids were induced with 4-OH  
294 tamoxifen for 24 hours on day 2. After further passages, the *Mll1*<sup>FC/FC; RC/+</sup>  
295 organoids increasingly formed round, less differentiated cyst-like spheres  
296 (Figs 6A-6C). qRT-PCR revealed mRNA downregulation of *Jaml* and  
297 transcription factors such as *Pitx2* and *Foxa1* (Fig 6D) indicating the expected  
298 loss of ISCs and elevation of the goblet cell marker, *Muc2*. Notably the cyst-  
299 like organoids kept proliferating after loss of MLL1 and the *Lgr5*<sup>+</sup> ISC marker,

300 *Olfm4*, was elevated indicating differences between events in the crypt and in  
301 culture. Differences are also indicated by the elevation of the Paneth cell  
302 markers *Mmp7*, *Wnt3* and the elevation of the putative JAML receptor, *Cxadr*,  
303 which might enable the transition from organoids to spheroids (Fig 6D). These  
304 data establish a cell intrinsic requirement for MLL1 and indicate that it is  
305 required to maintain ISCs in organoid cultures.

## 306 **Discussion**

307

308           Here we add a fourth stem cell to the known MLL1 repertoire of (i)  
309 HSCs [20, 21], (ii) skeletal muscle satellite cells [26] and (iii) postnatal neural  
310 stem cells (NSCs) [27]. The complete concordance between known MLL1  
311 functions in postnatal stem cells suggests that MLL1 conveys an essential  
312 stem cell property. This possibility is enhanced by comparison to the MLL1  
313 paralogue, MLL2, whose known functions in adult mice do not relate to stem  
314 cells rather macrophages (to respond to lipopolysaccharides) or fertility [48-  
315 51].

316           To explore the idea that MLL1 conveys a key stem cell property, we  
317 inspected the transcriptome profiles after conditional loss of MLL1 in the four  
318 adult/postnatal stem cells [26, 27, 52] (Supplementary excel file 1). However  
319 no shared candidate regulators or gene expression programs were identified.  
320 Although deeper, more systematic, transcriptome or cell biology approaches  
321 may reveal a shared MLL1 stem cell property, the lack of concordance  
322 between MLL1 regulation of these four stem cell transcriptomes is not  
323 unexpected. Previous work with MLL1 noted that direct target genes are not  
324 shared between different cell types [52] and a similar observation was made  
325 for MLL2 [48]. That is, the regulation of gene expression by the Trithorax  
326 homologues, MLL1 and MLL2, varies depending on the cell type and is not  
327 universal.

328           As again documented here for ISCs, the strongest relationship  
329 between the loss of MLL1 and cellular processes involves the downregulation  
330 of mRNAs that regulate transcription. Upon loss of MLL1, downregulation of



331 transcription factor mRNAs include - (i) in HSCs; *Mecom*, *Prdm16*, *Pbx1*,  
332 *Eya1*, *Meis1* and *Hoxa9*; (ii) in postnatal NSCs; *Nkx2.1*, *Nkx2.3*; (iii) in satellite  
333 cells; *Pax7* and (iv) in ISCs; *Pitx2*, *Foxa1*, *Gata4* and *Onecut2*.

334 How does MLL1 regulate key lineage specific transcription factors  
335 differently in different lineages? MLL1 and MLL2 are amongst the few proteins  
336 that include the CxxC zinc finger that binds unmethylated CpG dinucleotides  
337 [23, 53] as well as a PHD finger that binds H3K4me3 [54]. Hence, as  
338 suggested before [48], MLL1 and 2 have the potential ability to bind CpG  
339 island promoters without the need for recruitment by sequence specific DNA  
340 binding transcription factors. This potential accords with the observation that  
341 both MLL1 and 2 appear to be bound at almost all active promoters [40, 55].  
342 Consequently additional factors are required to explain the restricted  
343 transcriptional specificities of the MLLs. Notable in this regard, PAX7 is bound  
344 to MLL1 when satellite cells are activated, and enhanced transcriptional  
345 activation from both the *Myf5* promoter, to initiate skeletal muscle  
346 replenishment, and the *Pax7* promoter itself, depends on MLL1 [26]. This  
347 suggests that key transcription factors can either acquire the ability to interact  
348 with MLL1 bound at target promoters or recruit MLL1 to target promoters, or  
349 both.

350 Amongst the transcription factor mRNAs identified after loss of MLL1 in  
351 ISCs, *Pitx2* is prominent. *Pitx2* was previously identified as a direct target of  
352 MLL1 in ESCs and HSCs/hematopoietic progenitor cells [56, 57]. PITX2 is a  
353 homeodomain protein responsible for left-right asymmetric morphogenesis in  
354 the gut and proper positioning of the small intestine in the body cavity [58].  
355 Also notably identified in ISCs are *Foxa1* and *Onecut2*. Both genes,

356 previously known as *Hnf3 $\alpha$*  and *Hnf6 $\alpha$* , are expressed in all epithelia of the  
357 gastrointestinal tract from its embryonic origin into adulthood. Together with  
358 *Math1*, they are critical for goblet cell differentiation and function [59, 60].  
359 *Gata4*, which has previously been described as an MLL1 target gene [61], is  
360 also amongst the top downregulated mRNAs after loss of MLL1. Some  
361 aspects of the intestine specific deletion of *Gata4* in the adult mouse resemble  
362 the MLL1 phenotype described here including decreased proliferation in the  
363 crypts with increased numbers of goblet cells [62].

364 In addition to the central relationship between MLL1 and transcription  
365 factor expression, by far the most dramatically downregulated mRNA in both 4  
366 and 10 day ISC transcriptomes was *Jaml*, which was previously included in  
367 the transcriptome profile that characterizes ISCs [43, 44]. As a prominent cell  
368 adhesion molecule, investigations by Tetteh and Clevers found that *Jaml* is  
369 expressed in the base of the crypt in ISCs but not Paneth cells and used  
370 *Villin-CreERT2* to conditionally knock it out [63]. Loss of *Jaml* resulted in loss  
371 of both *Olfm4*<sup>+</sup> ISCs and proliferation in the crypt without loss of Paneth cells.  
372 These observations support the conclusion that MLL1 contributes to ISC  
373 function mainly by expression of *Jaml*. However in contrast to the loss of  
374 MLL1, Tetteh and Clevers did not observe an increase in goblet cells after  
375 loss of JAML. Imbalanced commitment in the secretory lineage may indicate a  
376 second aspect of MLL1 function that does not operate through *Jaml*  
377 expression, possibly including the regulation of *Gata4* expression [62] and  
378 other transcription factors. Upon loss of MLL1 *Jaml* is downregulated and the  
379 close association between stem cells and Paneth cells is probably  
380 destabilized (Fig 7). ISCs are anchored in the crypt surrounded by Paneth

381 cells, which confers positional identity. The central ISC at the bottom of the  
382 crypt flanked by two Paneth cells has long-term self-renewal potential  
383 compared to border ISCs [64]. Interestingly positional identity of NSCs seems  
384 to be regulated in an MLL1 dependent fashion [27].

385         Once again we report the remarkably specific dependency of the  
386 expression of one or two genes on a Trithorax homologue. As described here,  
387 loss of MLL1 resulted in loss of *Jaml* expression with subsequent significant  
388 functional consequences in the crypt. In ESCs, the expression of one gene,  
389 *Magoh2*, entirely depends on MLL2. Removal of MLL2 resulted in the  
390 suppression of *Magoh2* expression by H3K27 methylation, followed by DNA  
391 methylation [48], thereby providing more evidence supporting the conclusion  
392 that a primary function of Trithorax action is to prevent Polycomb-Group  
393 repression [65]. These observations and conclusions with *Magoh2* in ESCs  
394 were recently confirmed [66]. Selective gene specific anti-repression could  
395 also explain the action of MLL2 on *Pigp* in macrophages [49] and MLL1 on  
396 *Hoxa9* in HSCs [25].

397         Despite a high degree of evolutionary conservation and near-  
398 ubiquitous expression, the Trithorax homologues appear to regulate a small  
399 number of genes in cell-type specific patterns, one or two of which are entirely  
400 dependent on one homologue for expression due to anti-repression. In ISCs  
401 this extraordinary specificity is focused on *Jaml* with functional consequences  
402 for the crypt niche. As observed in other adult stem cells, MLL1 also regulates  
403 the expression of transcription factors in ISCs that likely influence lineage  
404 commitment decisions. These observations lead to the attractive proposition  
405 that MLL1 is a master stem cell regulator. However a unifying molecular basis

406 for this proposition remains to be identified.

## 407 **Methods and materials**

408

### 409 **Targeting constructs**

410 The targeting construct for *Mll1* was generated using recombineering (S1A  
411 Fig) employing an engrailed-intron-splice-acceptor-IRES-LacZ-Neomycin-  
412 polyA cassette flanked by FRT sites [39]. The critical exon 2, which upon  
413 deletion results in a frameshift and a premature stop codon in exon 3, was  
414 flanked by loxP sites.

### 415 **Gene targeting and generation of conditional knockout mice**

416 Gene targeting in R1 embryonic stem cells (ESCs) was performed as  
417 described [67]. Correct integration in the *Mll1* locus was confirmed by  
418 Southern blot analysis using an internal probe and 5' and 3' external probes  
419 (S1B and S1C Figs). Two correctly targeted ESC clones were injected into  
420 blastocysts and gave rise to several chimeras, which were able to establish  
421 germ line transmission. *Mll1*<sup>A/+</sup> mice were crossed to the *hACTB-Flpe* line to  
422 generate *Mll1*<sup>F/+</sup> mice. *Mll1*<sup>A/+</sup> and *Mll1*<sup>F/+</sup> mice were backcrossed at least six  
423 generations to *C57BL/6JOlaHsd* mice. Subsequently, those mice were  
424 crossed to the *Rosa26-Cre-ERT2* (*RC*) line [5] to generate conditional,  
425 tamoxifen-inducible *Mll1*<sup>F/+; RC/+</sup> mice. *Mll1*<sup>F/+</sup> mice were bred with *Lgr5-eGFP-*  
426 *CreERT2* and *Villin-CreER<sup>T2</sup>* (*Vil-Cre-ERT2*) [29, 41] mice. Primers for  
427 genotyping are provided in S2 Table. Experiments were performed in  
428 accordance with German animal welfare legislation, and were approved by  
429 the relevant authorities, the Landesdirektion Dresden.

### 430 **Tamoxifen**

431 Tamoxifen (Sigma Aldrich, T5648) was given to at least 10-week old mice by

432 gavage (4.5 mg per day) for six days with three days break in between [68].  
433 For RNA-Sequencing experiments, *Mll1*<sup>F/+</sup>; and *Mll1*<sup>F/F</sup>; *Lgr5-eGFP-CreERT2*<sup>+</sup> mice  
434 received 1 mg tamoxifen via intraperitoneal (IP) injection for 3 consecutive  
435 days. Intestinal organoids were induced on day 2 after splitting using 800 nM  
436 4-OH tamoxifen (Sigma H7904) for 24 h.

### 437 **Bone marrow transplantation**

438 *Mll1*<sup>F/+</sup>; *RC*<sup>+</sup> and *Mll1*<sup>F/F</sup>; *RC*<sup>+</sup> recipient (CD45.2) mice were lethally irradiated  
439 with 8.5 Gy (X-ray source MaxiShot from Xlon). Bone marrow cells from  
440 B6.SJL mice (CD45.1) were prepared by crushing with a mortar and pestle in  
441 ice-cold PBS supplemented with 5% fetal bovine serum. Red blood cells were  
442 removed with ACK lysis buffer (Thermo Fisher Scientific).  $1 \times 10^6$  lineage  
443 depleted ( $\text{Lin}^-$ ) bone marrow cells were injected into the retro-orbital venous  
444 plexus. Animals were maintained on water containing 1,17 mg/ml Neomycin  
445 (Merck) for three weeks after irradiation. Complete donor cell engraftment of  
446 wt CD45.1<sup>+</sup> cells was confirmed by flow cytometry on peripheral blood with  
447 antibodies directed against the following murine antigens (clones given in  
448 brackets): CD45.1 (A20), CD45.2 (104), CD11b (M1/70), Gr-1 (RB6-8C5).  
449 Stably engrafted mice were fed six times with tamoxifen 30 weeks after  
450 transplantation. FACS analysis for KSL-Slam enriched HSCs was done with  
451 antibodies directed against the following murine antigens: CD3 (2C11; 17A2),  
452 CD11b (M1/70), CD16/32 (93), CD19 (eBio 1D3), CD34 (RAM34), CD45.1  
453 (A20), CD45.2 (104), CD45R (RA3-6B2), CD117 (2B8), CD135 (A2F10), Gr-1  
454 (RB6-8C5), Nk1.1 (PK136), Ter119 (Ter119, all eBioscience), CD11b (M1/70)  
455 and CD45.1 (A20, all BD Pharmingen), Sca-1 (D7), CD48 (HM48-1) and  
456 CD150 (TC15-12F1, all BioLegends).  $\text{Lin}^-$  cells were identified by lack of CD3,

457 CD11b, CD19, CD45R, Gr-1, Nk1.1 and Ter119 expression.

458 **5-Bromo-2-deoxyuridine (BrdU) assay**

459 Mice were injected IP with BrdU (0.6 mg/10 g body weight in sterile PBS) and  
460 sacrificed 2 h later. The jejunum was dissected in cold PBS and processed for  
461 immunohistochemistry.

462 **Histochemistry and immunohistochemistry**

463 Mouse intestine was flushed gently with cold PBS. Embryos were dissected  
464 from plugged mice on the respective gestational stage and placed in PBS.  
465 Intestine and embryos were fixed in 4% paraformaldehyde overnight.  
466 Dehydration and paraffin infiltration utilized the Paraffin-Infiltration-Processor  
467 (STP 420, Zeiss). Dehydrated tissues were embedded in paraffin (Paraffin  
468 Embedding Center EG1160, Leica) and 5 µm sections were prepared.  
469 Sections were deparaffinized in xylene, rehydrated through a series of  
470 alcohols, stained, dehydrated, and mounted. Femur sections were stained  
471 with Giemsa according to standard protocols. For the basic evaluation of the  
472 intestine hematoxylin and eosin (H&E) stain was performed. Periodic acid-  
473 Schiff (PAS) stain and alcian blue were used to identify goblet cells. For  
474 enterocytes, alkaline phosphatase stain was performed using two different  
475 methods. Sections were either incubated with Red Alkaline Phosphatase  
476 Substrate (Vector red, Vector Laboratories) for 10 minutes (min) or with  
477 nitroblue tetrazolium/5-bromo-4-chloro-3-indolyl phosphate solution for 30 min  
478 at room temperature (RT). For immunohistochemistry, antigen retrieval was  
479 performed by microwaving slides in 10 mM citrate buffer (pH 6.0) for 12 min  
480 (Microwave RHS 30, Diapath). Endogenous peroxidases were quenched with  
481 0.3% H<sub>2</sub>O<sub>2</sub> in methanol. Sections were incubated in blocking serum (5% goat

482 serum) for 1 hr at RT followed by overnight incubation with primary antibodies  
483 (S3 Table) at 4°C. Following incubation with the secondary antibody (S3  
484 Table) the immune peroxidase was detected using a Vectastain ELITE ABC  
485 kit (Vector) and visualized with a solution of diaminobenzidine (Sigma Aldrich)  
486 in the presence of 0.01% H<sub>2</sub>O<sub>2</sub>. All sections were counterstained with  
487 hematoxylin or alcian blue. Images were collected with an Olympus WF  
488 upright microscope and analyzed using the MetaMorph® Microscopy  
489 Automation and Image Analysis Software.

#### 490 ***In situ* hybridization**

491 The protocol for *in situ* hybridization was modified from [69]. Briefly, 8 µm  
492 thick sections were rehydrated. The sections were treated with 0.1 N HCl and  
493 proteinase K. Slides were postfixated and sections were then demethylated with  
494 acetic anhydride and prehybridized. Hybridization was done with 2 µg/ml  
495 digoxigenin (DIG)-labeled *Olfm4* RNA probe for 24 h at 65°C. Slides were  
496 washed and incubated with blocking solution for 1 hr. The sections were  
497 incubated with anti-DIG-alkaline phosphatase conjugate overnight at 4°C.  
498 Slides were washed and developed with BM purple.

#### 499 **Crypt isolation**

500 The jejunum was harvested from mice, flushed with ice cold PBS to remove  
501 any faecal content and cut open longitudinally. The tissue was placed lumen  
502 side up on a petri dish and the villi were removed by gently scraping the tissue  
503 using a glass cover slip. The tissue was cut into 2-4 cm pieces and was  
504 washed several times with ice-cold PBS to remove residual villi fragments.  
505 Tissues were transferred into a fresh tube containing 15 ml of 2 mM  
506 EDTA/PBS chelation buffer and placed on a rotating wheel for 30 min at 4°C.



507 The crypts were then detached from the basal membrane by vigorous shaking  
508 in 5% FCS/PBS solution. The suspension was filtered with a 100 µm cell  
509 strainer followed by a 70 µm cell strainer. Isolated crypts were centrifuged at  
510 800 rpm for 5 min at 4°C. The final fraction consisted of pure crypts and was  
511 used for cell culture or single cell dissociation.

### 512 **Organoid culture**

513 Purified crypts were resuspended in 10 ml DMEM/F12 (Life Technologies). 10  
514 µl of the crypt suspension was used to count the number of crypts under the  
515 microscope. The pelleted crypts were resuspended in Matrigel<sup>®</sup> matrix  
516 (Corning) at desired crypt density. Approximately, 400 crypts in 25 µl  
517 Matrigel<sup>®</sup> matrix were seeded per well in a pre-warmed 24-well plate and  
518 incubated for 15 min at 37°C until the Matrigel<sup>®</sup> matrix solidified. Then, 400 µl  
519 of IntestiCult<sup>™</sup> Organoid Growth Medium (STEMCELL Technologies) was  
520 added to each well. Organoids were cultured at 37°C in a 5% CO<sub>2</sub> incubator  
521 and maintained in culture for 5 days before being passaged and split for  
522 experimental procedures. The growth medium was replaced every 2-3 days

### 523 **Flow cytometry**

524 ISCs were initially characterized and identified with the use of an *Lgr5-eGFP-*  
525 *CreERT2* knockin allele [29]. *Mll1*<sup>F/+</sup> and *Mll1*<sup>F/F; Lgr5-eGFP-CreERT2/+</sup> littermates  
526 (n=4) were given tamoxifen via IP injections for 3 consecutive days and were  
527 dissected 4 and 10 days later. Crypts were dissociated into single cells with  
528 TrypLE Express (Thermo Fisher Scientific) for 30 min at 37°C. Dissociated  
529 cells were passed through 70 µm cell strainer and washed with 5% FCS/PBS.  
530 Cells were stained with antibodies with the following antibodies for 45 min on  
531 ice: anti-mouse CD24 PE (clone M1/69), anti-mouse CD326 (EpCAM) APC

532 (clone G8.8), anti-mouse CD45 Alexa-Fluor 700 (clone 104). Sorting was  
533 performed on a FACS Aria™ III cell sorter (BD). After scatter discrimination to  
534 remove doublets the cell suspension was negatively selected with SYTOX  
535 blue dead cell stain and anti-CD45 to remove dead and hematopoietic cells,  
536 respectively. The cells were then positively selected with anti-EpCAM to  
537 enrich for intestinal epithelial cells. According to [70] CD45<sup>-</sup>, EpCAM<sup>high</sup>,  
538 CD24<sup>med</sup> and GFP<sup>high</sup> characterized ISCs and CD45<sup>-</sup>, EpCAM<sup>high</sup>, CD24<sup>high</sup>  
539 and GFP<sup>-</sup> characterized Paneth cells (S3A and S3B Figs). *Mll1* recombination  
540 via PCR on the sorted populations confirmed deletion of *Mll1* solely in the  
541 stem cell compartment (S3C Fig).

#### 542 **RNA sequencing**

543 300 intestinal stem and Paneth cells were sorted into 2 µl of nuclease free  
544 water with 0.2% Triton-X 100 and 4 U murine RNase Inhibitor (NEB). RNA  
545 was reverse transcribed (Invitrogen) and cDNA amplified using Kapa HiFi  
546 HotStart Readymix (Roche). The cDNA quality and concentration was  
547 determined with the Fragment Analyzer (Agilent). Samples were subjected to  
548 library preparation (TruePrep DNA library Prep Kit V2 for Illumina, Vazyme).  
549 Libraries were purified followed by Illumina sequencing on a Nextseq500 with  
550 a sample sequencing depth of 30 million reads on average. The short reads  
551 were aligned to the mm10 transcriptome with GSNAP (2018-07-04) and a  
552 table of read counts per gene was created based on the overlap of the  
553 uniquely mapped reads with the Ensembl Gene annotation version 92, using  
554 featureCounts (version 1.6.3). Normalization of the raw read counts based on  
555 the library size and testing for differential gene expression between the  
556 different genotypes was performed using the DESeq2 R package (version

557 1.24.0). Genes with an adjusted p-value ( $p_{adj}$ )  $\leq$  0.05 were considered as  
558 significantly differentially expressed accepting a 5% FDR. To identify  
559 enrichment for particular biological processes and pathways associated with  
560 the DEGs, the DAVID GO/BP/FAT and KEGG database [71] was used. Gene  
561 set enrichment analysis was performed using GSEA software from the Broad  
562 Institute [72].

### 563 **Reverse transcription and quantitative PCR (qRT-PCR) analysis**

564 RNA from sorted cells and organoids was extracted using Trizol (Sigma-  
565 Aldrich) and reverse transcribed using AffinityScript Multiple Temperature  
566 cDNA Synthesis Kit (Agilent Technologies). Real-time quantitative PCR was  
567 performed with GoTaq qPCR Master Mix (Promega) by Mx3000P QPCR  
568 System (Agilent Technologies). Ct values were normalized against *Rpl19*.  
569 Primer sequences and length of the amplified products are given in S2 Table.  
570 Fold differences in expression levels were calculated according to the  $2^{-\Delta Ct}$   
571 method [73].

### 572 **Quantification and Statistical analysis**

573 Data is presented as mean and error bars indicate standard deviation (s.d.)  
574 unless otherwise indicated. Statistical details of the experiments can be found  
575 in the figure legends. Graphs and statistics were generated with GraphPad  
576 Prism software (v6.0) and Microsoft excel. Significance (p-values) for Kaplan-  
577 Meier graphs was determined by Mantel-Cox test. Significance (p-values  $<$   
578 0.05) was determined with Wald test or two-tailed Student's *t* test.  
579 Significance for the breeding statistics was determined with Chi-square test. N  
580 indicates the numbers of independent biological replicates per experiment  
581 unless otherwise indicated.

582 **Data availability:** RNA sequencing data have been deposited in the Gene  
583 Expression Omnibus under accession number GSE 157285.

584

## 585 **Acknowledgements**

586 We thank Mandy Obst, Isabell Kolbe, Heike Petzold and Stefanie  
587 Weidlich for excellent technical assistance. We also thank the Biomedical  
588 Services (BMS) of the Max Planck Institute of Molecular Cell Biology and  
589 Genetics, Dresden for the excellent service and technical assistance. We are  
590 grateful to Prof. Sebastian Zeissig (CRTD, Dresden) for helpful advice. We  
591 thank the core facilities of the Biotechnology Center for providing assistance  
592 with flow cytometry (Katja Schneider). The Advanced Imaging Facility, a core  
593 facility of the CMCB Technology Platform at TU Dresden, [http://biotp.tu-](http://biotp.tu-dresden.de/facilities/advanced-imaging/)  
594 [dresden.de/facilities/advanced-imaging/](http://biotp.tu-dresden.de/facilities/advanced-imaging/) assisted this research.

## 595 References

596

597 1. Blanpain C, Fuchs E. Stem cell plasticity. Plasticity of epithelial stem  
598 cells in tissue regeneration. *Science*. 2014;344(6189):1242281. Epub  
599 2014/06/14. doi: 10.1126/science.1242281. PubMed PMID: 24926024;  
600 PubMed Central PMCID: PMC4523269.

601 2. Simons BD, Clevers H. Strategies for homeostatic stem cell self-  
602 renewal in adult tissues. *Cell*. 2011;145(6):851-62. doi:  
603 10.1016/j.cell.2011.05.033. PubMed PMID: 21663791.

604 3. Stadhouders R, Fillion GJ, Graf T. Transcription factors and 3D genome  
605 conformation in cell-fate decisions. *Nature*. 2019;569(7756):345-54. Epub  
606 2019/05/17. doi: 10.1038/s41586-019-1182-7. PubMed PMID: 31092938.

607 4. Arndt K, Kranz A, Fohgrub J, Jolly A, Bledau AS, Di Virgilio M, et al.  
608 SETD1A protects HSCs from activation-induced functional decline in vivo.  
609 *Blood*. 2018;131(12):1311-24. Epub 2018/01/20. doi: 10.1182/blood-2017-09-  
610 806844. PubMed PMID: 29348130.

611 5. Schmidt K, Zhang Q, Tasdogan A, Petzold A, Dahl A, Arneith BM, et al.  
612 The H3K4 methyltransferase Setd1b is essential for hematopoietic stem and  
613 progenitor cell homeostasis in mice. *Elife*. 2018;7. Epub 2018/06/20. doi:  
614 10.7554/eLife.27157. PubMed PMID: 29916805; PubMed Central PMCID:  
615 PMC6025962.

616 6. Chen Y, Anastassiadis K, Kranz A, Stewart AF, Arndt K, Waskow C, et  
617 al. MLL2, Not MLL1, Plays a Major Role in Sustaining MLL-Rearranged Acute  
618 Myeloid Leukemia. *Cancer Cell*. 2017;31(6):755-70 e6. Epub 2017/06/14. doi:  
619 10.1016/j.ccell.2017.05.002. PubMed PMID: 28609655; PubMed Central  
620 PMCID: PMC5598468.

621 7. Di Carlo V, Mocavini I, Di Croce L. Polycomb complexes in normal and  
622 malignant hematopoiesis. *J Cell Biol*. 2019;218(1):55-69. Epub 2018/10/21.  
623 doi: 10.1083/jcb.201808028. PubMed PMID: 30341152; PubMed Central  
624 PMCID: PMC6314559.

625 8. Lyko F. The DNA methyltransferase family: a versatile toolkit for  
626 epigenetic regulation. *Nat Rev Genet*. 2018;19(2):81-92. Epub 2017/10/17.  
627 doi: 10.1038/nrg.2017.80. PubMed PMID: 29033456.

628 9. Piunti A, Shilatifard A. Epigenetic balance of gene expression by  
629 Polycomb and COMPASS families. *Science*. 2016;352(6290):aad9780. Epub  
630 2016/06/04. doi: 10.1126/science.aad9780. PubMed PMID: 27257261.

631 10. Liang G, Lin JC, Wei V, Yoo C, Cheng JC, Nguyen CT, et al. Distinct  
632 localization of histone H3 acetylation and H3-K4 methylation to the  
633 transcription start sites in the human genome. *Proc Natl Acad Sci U S A*.  
634 2004;101(19):7357-62. Epub 2004/05/05. doi: 10.1073/pnas.0401866101.  
635 PubMed PMID: 15123803; PubMed Central PMCID: PMC409923.

636 11. Soares LM, He PC, Chun Y, Suh H, Kim T, Buratowski S.  
637 Determinants of Histone H3K4 Methylation Patterns. *Mol Cell*.  
638 2017;68(4):773-85 e6. Epub 2017/11/14. doi: 10.1016/j.molcel.2017.10.013.  
639 PubMed PMID: 29129639; PubMed Central PMCID: PMC5706784.

640 12. Choudhury R, Singh S, Arumugam S, Roguev A, Stewart AF. The Set1  
641 complex is dimeric and acts with Jhd2 demethylation to convey symmetrical  
642 H3K4 trimethylation. *Genes Dev*. 2019;33(9-10):550-64. Epub 2019/03/08.  
643 doi: 10.1101/gad.322222.118. PubMed PMID: 30842216; PubMed Central  
644 PMCID: PMC6499330.

- 645 13. Suganuma T, Workman JL. Chromatin and signaling. *Curr Opin Cell*  
646 *Biol.* 2013;25(3):322-6. doi: 10.1016/j.ceb.2013.02.016. PubMed PMID:  
647 23498660.
- 648 14. Heintzman ND, Hon GC, Hawkins RD, Kheradpour P, Stark A, Harp  
649 LF, et al. Histone modifications at human enhancers reflect global cell-type-  
650 specific gene expression. *Nature.* 2009;459(7243):108-12. doi:  
651 10.1038/nature07829. PubMed PMID: 19295514; PubMed Central PMCID:  
652 PMC2910248.
- 653 15. Ernst P, Vakoc CR. WRAD: enabler of the SET1-family of H3K4  
654 methyltransferases. *Brief Funct Genomics.* 2012;11(3):217-26. Epub  
655 2012/06/02. doi: 10.1093/bfgp/els017. PubMed PMID: 22652693; PubMed  
656 Central PMCID: PMCPMC3388306.
- 657 16. Roguev A, Schaft D, Shevchenko A, Pijnappel WW, Wilm M, Aasland  
658 R, et al. The *Saccharomyces cerevisiae* Set1 complex includes an Ash2  
659 homologue and methylates histone 3 lysine 4. *EMBO J.* 2001;20(24):7137-48.  
660 Epub 2001/12/18. doi: 10.1093/emboj/20.24.7137. PubMed PMID: 11742990;  
661 PubMed Central PMCID: PMCPMC125774.
- 662 17. Milne TA, Briggs SD, Brock HW, Martin ME, Gibbs D, Allis CD, et al.  
663 MLL targets SET domain methyltransferase activity to Hox gene promoters.  
664 *Mol Cell.* 2002;10(5):1107-17. Epub 2002/11/28. doi: 10.1016/s1097-  
665 2765(02)00741-4. PubMed PMID: 12453418.
- 666 18. Yagi H, Deguchi K, Aono A, Tani Y, Kishimoto T, Komori T. Growth  
667 disturbance in fetal liver hematopoiesis of Mll-mutant mice. *Blood.*  
668 1998;92(1):108-17. Epub 1998/06/25. PubMed PMID: 9639506.
- 669 19. Ernst P, Fisher JK, Avery W, Wade S, Foy D, Korsmeyer SJ. Definitive  
670 hematopoiesis requires the mixed-lineage leukemia gene. *Dev Cell.*  
671 2004;6(3):437-43. Epub 2004/03/20. PubMed PMID: 15030765.
- 672 20. Jude CD, Climer L, Xu D, Artinger E, Fisher JK, Ernst P. Unique and  
673 independent roles for MLL in adult hematopoietic stem cells and progenitors.  
674 *Cell Stem Cell.* 2007;1(3):324-37. doi: 10.1016/j.stem.2007.05.019. PubMed  
675 PMID: 18371366; PubMed Central PMCID: PMC2234224.
- 676 21. Gan T, Jude CD, Zaffuto K, Ernst P. Developmentally induced Mll1 loss  
677 reveals defects in postnatal haematopoiesis. *Leukemia.* 2010;24(10):1732-41.  
678 doi: 10.1038/leu.2010.171. PubMed PMID: 20724987; PubMed Central  
679 PMCID: PMC2954260.
- 680 22. Slany RK. The molecular biology of mixed lineage leukemia.  
681 *Haematologica.* 2009;94(7):984-93. doi: 10.3324/haematol.2008.002436.  
682 PubMed PMID: 19535349; PubMed Central PMCID: PMC2704309.
- 683 23. Bach C, Mueller D, Buhl S, Garcia-Cuellar MP, Slany RK. Alterations of  
684 the CxxC domain preclude oncogenic activation of mixed-lineage leukemia 2.  
685 *Oncogene.* 2009;28(6):815-23. doi: 10.1038/onc.2008.443. PubMed PMID:  
686 19060922.
- 687 24. Slany RK. MLL fusion proteins and transcriptional control. *Biochim*  
688 *Biophys Acta Gene Regul Mech.* 2020;1863(3):194503. Epub 2020/02/18.  
689 doi: 10.1016/j.bbagr.2020.194503. PubMed PMID: 32061883.
- 690 25. Milne TA, Kim J, Wang GG, Stadler SC, Basrur V, Whitcomb SJ, et al.  
691 Multiple interactions recruit MLL1 and MLL1 fusion proteins to the HOXA9  
692 locus in leukemogenesis. *Mol Cell.* 2010;38(6):853-63. doi:  
693 10.1016/j.molcel.2010.05.011. PubMed PMID: 20541448; PubMed Central  
694 PMCID: PMC2902588.



- 695 26. Addicks GC, Brun CE, Sincennes MC, Saber J, Porter CJ, Francis  
696 Stewart A, et al. MLL1 is required for PAX7 expression and satellite cell self-  
697 renewal in mice. *Nat Commun.* 2019;10(1):4256. Epub 2019/09/20. doi:  
698 10.1038/s41467-019-12086-9. PubMed PMID: 31534153; PubMed Central  
699 PMCID: PMC6751293.
- 700 27. Delgado RN, Mansky B, Ahanger SH, Lu C, Andersen RE, Dou Y, et  
701 al. Maintenance of neural stem cell positional identity by mixed-lineage  
702 leukemia 1. *Science.* 2020;368(6486):48-53. Epub 2020/04/04. doi:  
703 10.1126/science.aba5960. PubMed PMID: 32241942.
- 704 28. Clevers H. The intestinal crypt, a prototype stem cell compartment.  
705 *Cell.* 2013;154(2):274-84. doi: 10.1016/j.cell.2013.07.004. PubMed PMID:  
706 23870119.
- 707 29. Barker N, van Es JH, Kuipers J, Kujala P, van den Born M, Cozijnsen  
708 M, et al. Identification of stem cells in small intestine and colon by marker  
709 gene *Lgr5*. *Nature.* 2007;449(7165):1003-7. Epub 2007/10/16. doi:  
710 10.1038/nature06196. PubMed PMID: 17934449.
- 711 30. Gehart H, Clevers H. Tales from the crypt: new insights into intestinal  
712 stem cells. *Nat Rev Gastroenterol Hepatol.* 2019;16(1):19-34. Epub  
713 2018/11/16. doi: 10.1038/s41575-018-0081-y. PubMed PMID: 30429586.
- 714 31. Tian H, Biehs B, Warming S, Leong KG, Rangell L, Klein OD, et al. A  
715 reserve stem cell population in small intestine renders *Lgr5*-positive cells  
716 dispensable. *Nature.* 2011;478(7368):255-9. doi: 10.1038/nature10408.  
717 PubMed PMID: 21927002; PubMed Central PMCID: PMC4251967.
- 718 32. Tetteh PW, Basak O, Farin HF, Wiebrands K, Kretschmar K, Begthel  
719 H, et al. Replacement of Lost *Lgr5*-Positive Stem Cells through Plasticity of  
720 Their Enterocyte-Lineage Daughters. *Cell Stem Cell.* 2016;18(2):203-13.  
721 Epub 2016/02/03. doi: 10.1016/j.stem.2016.01.001. PubMed PMID:  
722 26831517.
- 723 33. van Es JH, Sato T, van de Wetering M, Lyubimova A, Yee Nee AN,  
724 Gregorieff A, et al. *Dll1*+ secretory progenitor cells revert to stem cells upon  
725 crypt damage. *Nat Cell Biol.* 2012;14(10):1099-104. Epub 2012/09/25. doi:  
726 10.1038/ncb2581. PubMed PMID: 23000963; PubMed Central PMCID:  
727 PMC3789123.
- 728 34. Jadhav U, Saxena M, O'Neill NK, Saadatpour A, Yuan GC, Herbert Z,  
729 et al. Dynamic Reorganization of Chromatin Accessibility Signatures during  
730 Dedifferentiation of Secretory Precursors into *Lgr5*+ Intestinal Stem Cells. *Cell*  
731 *Stem Cell.* 2017;21(1):65-77 e5. Epub 2017/06/27. doi:  
732 10.1016/j.stem.2017.05.001. PubMed PMID: 28648363; PubMed Central  
733 PMCID: PMC5505276.
- 734 35. Yu S, Tong K, Zhao Y, Balasubramanian I, Yap GS, Ferraris RP, et al.  
735 Paneth Cell Multipotency Induced by Notch Activation following Injury. *Cell*  
736 *Stem Cell.* 2018;23(1):46-59 e5. Epub 2018/06/12. doi:  
737 10.1016/j.stem.2018.05.002. PubMed PMID: 29887318; PubMed Central  
738 PMCID: PMC6035085.
- 739 36. Yang W, Ernst P. Distinct functions of histone H3, lysine 4  
740 methyltransferases in normal and malignant hematopoiesis. *Curr Opin*  
741 *Hematol.* 2017;24(4):322-8. Epub 2017/04/05. doi:  
742 10.1097/moh.0000000000000346. PubMed PMID: 28375985; PubMed  
743 Central PMCID: PMC5603181.

- 744 37. Tetteh PW, Farin HF, Clevers H. Plasticity within stem cell hierarchies  
745 in mammalian epithelia. *Trends Cell Biol.* 2015;25(2):100-8. doi:  
746 10.1016/j.tcb.2014.09.003. PubMed PMID: 25308311.
- 747 38. Fu J, Teucher M, Anastassiadis K, Skarnes W, Stewart AF. A  
748 recombineering pipeline to make conditional targeting constructs. *Methods*  
749 *Enzymol.* 2010;477:125-44. Epub 2010/08/12. doi: 10.1016/s0076-  
750 6879(10)77008-7. PubMed PMID: 20699140.
- 751 39. Testa G, Schaft J, van der Hoeven F, Glaser S, Anastassiadis K,  
752 Zhang Y, et al. A reliable lacZ expression reporter cassette for multipurpose,  
753 knockout-first alleles. *Genesis.* 2004;38(3):151-8. doi: 10.1002/gene.20012.  
754 PubMed PMID: 15048813.
- 755 40. Denissov S, Hofemeister H, Marks H, Kranz A, Ciotta G, Singh S, et al.  
756 Mll2 is required for H3K4 trimethylation on bivalent promoters in embryonic  
757 stem cells, whereas Mll1 is redundant. *Development.* 2014;141(3):526-37.  
758 Epub 2014/01/16. doi: 10.1242/dev.102681. PubMed PMID: 24423662.
- 759 41. el Marjou F, Janssen KP, Chang BH, Li M, Hindie V, Chan L, et al.  
760 Tissue-specific and inducible Cre-mediated recombination in the gut  
761 epithelium. *Genesis.* 2004;39(3):186-93. Epub 2004/07/30. doi:  
762 10.1002/gene.20042. PubMed PMID: 15282745.
- 763 42. Yan KS, Gevaert O, Zheng GXY, Anchang B, Probert CS, Larkin KA, et  
764 al. Intestinal Enteroendocrine Lineage Cells Possess Homeostatic and Injury-  
765 Inducible Stem Cell Activity. *Cell Stem Cell.* 2017;21(1):78-90 e6. Epub  
766 2017/07/08. doi: 10.1016/j.stem.2017.06.014. PubMed PMID: 28686870;  
767 PubMed Central PMCID: PMC5642297.
- 768 43. Munoz J, Stange DE, Schepers AG, van de Wetering M, Koo BK,  
769 Itzkovitz S, et al. The Lgr5 intestinal stem cell signature: robust expression of  
770 proposed quiescent '+4' cell markers. *EMBO J.* 2012;31(14):3079-91. Epub  
771 2012/06/14. doi: 10.1038/emboj.2012.166. PubMed PMID: 22692129;  
772 PubMed Central PMCID: PMC3400017.
- 773 44. Haber AL, Biton M, Rogel N, Herbst RH, Shekhar K, Smillie C, et al. A  
774 single-cell survey of the small intestinal epithelium. *Nature.*  
775 2017;551(7680):333-9. Epub 2017/11/17. doi: 10.1038/nature24489. PubMed  
776 PMID: 29144463; PubMed Central PMCID: PMC6022292.
- 777 45. Zen K, Liu Y, McCall IC, Wu T, Lee W, Babbitt BA, et al. Neutrophil  
778 migration across tight junctions is mediated by adhesive interactions between  
779 epithelial coxsackie and adenovirus receptor and a junctional adhesion  
780 molecule-like protein on neutrophils. *Mol Biol Cell.* 2005;16(6):2694-703.  
781 Epub 2005/04/01. doi: 10.1091/mbc.e05-01-0036. PubMed PMID: 15800062;  
782 PubMed Central PMCID: PMC1142417.
- 783 46. Kawabata K, Tashiro K, Sakurai F, Osada N, Kusuda J, Hayakawa T,  
784 et al. Positive and negative regulation of adenovirus infection by CAR-like  
785 soluble protein, CLSP. *Gene Ther.* 2007;14(16):1199-207. Epub 2007/06/01.  
786 doi: 10.1038/sj.gt.3302975. PubMed PMID: 17538635.
- 787 47. Rodríguez-Colman MJ, Schewe M, Meerlo M, Stigter E, Gerrits J,  
788 Pras-Raves M, et al. Interplay between metabolic identities in the intestinal  
789 crypt supports stem cell function. *Nature.* 2017;543(7645):424-7. Epub  
790 2017/03/09. doi: 10.1038/nature21673. PubMed PMID: 28273069.
- 791 48. Glaser S, Lubitz S, Loveland KL, Ohbo K, Robb L, Schwenk F, et al.  
792 The histone 3 lysine 4 methyltransferase, Mll2, is only required briefly in  
793 development and spermatogenesis. *Epigenetics Chromatin.* 2009;2(1):5. doi:



- 794 10.1186/1756-8935-2-5. PubMed PMID: 19348672; PubMed Central PMCID:  
795 PMC2674429.
- 796 49. Austenaa L, Barozzi I, Chronowska A, Termanini A, Ostuni R,  
797 Prosperini E, et al. The histone methyltransferase Wbp7 controls macrophage  
798 function through GPI glycolipid anchor synthesis. *Immunity*. 2012;36(4):572-  
799 85. doi: 10.1016/j.immuni.2012.02.016. PubMed PMID: 22483804.
- 800 50. Andreu-Vieyra CV, Chen R, Agno JE, Glaser S, Anastassiadis K,  
801 Stewart AF, et al. MLL2 is required in oocytes for bulk histone 3 lysine 4  
802 trimethylation and transcriptional silencing. *PLoS Biol*. 2010;8(8). doi:  
803 10.1371/journal.pbio.1000453. PubMed PMID: 20808952; PubMed Central  
804 PMCID: PMC2923083.
- 805 51. Hanna CW, Taudt A, Huang J, Gahurova L, Kranz A, Andrews S, et al.  
806 MLL2 conveys transcription-independent H3K4 trimethylation in oocytes. *Nat*  
807 *Struct Mol Biol*. 2018;25(1):73-82. Epub 2018/01/13. doi: 10.1038/s41594-  
808 017-0013-5. PubMed PMID: 29323282.
- 809 52. Artinger EL, Mishra BP, Zaffuto KM, Li BE, Chung EK, Moore AW, et  
810 al. An MLL-dependent network sustains hematopoiesis. *Proc Natl Acad Sci U*  
811 *S A*. 2013;110(29):12000-5. doi: 10.1073/pnas.1301278110. PubMed PMID:  
812 23744037; PubMed Central PMCID: PMC3718146.
- 813 53. Carlone DL, Hart SR, Ladd PD, Skalnik DG. Cloning and  
814 characterization of the gene encoding the mouse homologue of CpG binding  
815 protein. *Gene*. 2002;295(1):71-7. Epub 2002/09/21. doi: 10.1016/s0378-  
816 1119(02)00820-x. PubMed PMID: 12242013.
- 817 54. Chang PY, Hom RA, Musselman CA, Zhu L, Kuo A, Gozani O, et al.  
818 Binding of the MLL PHD3 finger to histone H3K4me3 is required for MLL-  
819 dependent gene transcription. *J Mol Biol*. 2010;400(2):137-44. doi:  
820 10.1016/j.jmb.2010.05.005. PubMed PMID: 20452361; PubMed Central  
821 PMCID: PMC2886590.
- 822 55. Guenther MG, Jenner RG, Chevalier B, Nakamura T, Croce CM,  
823 Canaani E, et al. Global and Hox-specific roles for the MLL1  
824 methyltransferase. *Proc Natl Acad Sci U S A*. 2005;102(24):8603-8. doi:  
825 10.1073/pnas.0503072102. PubMed PMID: 15941828; PubMed Central  
826 PMCID: PMC1150839.
- 827 56. Ernst P, Mabon M, Davidson AJ, Zon LI, Korsmeyer SJ. An Mll-  
828 dependent Hox program drives hematopoietic progenitor expansion. *Curr Biol*.  
829 2004;14(22):2063-9. doi: 10.1016/j.cub.2004.11.012. PubMed PMID:  
830 15556871.
- 831 57. Degar BA, Baskaran N, Hulspas R, Quesenberry PJ, Weissman SM,  
832 Forget BG. The homeodomain gene *Pitx2* is expressed in primitive  
833 hematopoietic stem/progenitor cells but not in their differentiated progeny. *Exp*  
834 *Hematol*. 2001;29(7):894-902. Epub 2001/07/05. doi: 10.1016/s0301-  
835 472x(01)00661-0. PubMed PMID: 11438212.
- 836 58. Welsh IC, Thomsen M, Gludish DW, Alfonso-Parra C, Bai Y, Martin JF,  
837 et al. Integration of left-right *Pitx2* transcription and Wnt signaling drives  
838 asymmetric gut morphogenesis via *Daam2*. *Dev Cell*. 2013;26(6):629-44.  
839 Epub 2013/10/05. doi: 10.1016/j.devcel.2013.07.019. PubMed PMID:  
840 24091014; PubMed Central PMCID: PMCPMC3965270.
- 841 59. Ye DZ, Kaestner KH. *Foxa1* and *Foxa2* control the differentiation of  
842 goblet and enteroendocrine L- and D-cells in mice. *Gastroenterology*.

- 843 2009;137(6):2052-62. Epub 2009/09/10. doi: 10.1053/j.gastro.2009.08.059.  
844 PubMed PMID: 19737569; PubMed Central PMCID: PMCPMC2789913.
- 845 60. van der Sluis M, Vincent A, Bouma J, Korteland-Van Male A, van  
846 Goudoever JB, Renes IB, et al. Forkhead box transcription factors Foxa1 and  
847 Foxa2 are important regulators of Muc2 mucin expression in intestinal  
848 epithelial cells. *Biochem Biophys Res Commun*. 2008;369(4):1108-13. Epub  
849 2008/03/14. doi: 10.1016/j.bbrc.2008.02.158. PubMed PMID: 18336786.
- 850 61. Wang P, Lin C, Smith ER, Guo H, Sanderson BW, Wu M, et al. Global  
851 analysis of H3K4 methylation defines MLL family member targets and points  
852 to a role for MLL1-mediated H3K4 methylation in the regulation of  
853 transcriptional initiation by RNA polymerase II. *Mol Cell Biol*.  
854 2009;29(22):6074-85. doi: 10.1128/MCB.00924-09. PubMed PMID:  
855 19703992; PubMed Central PMCID: PMC2772563.
- 856 62. Beuling E, Baffour-Awuah NY, Stapleton KA, Aronson BE, Noah TK,  
857 Shroyer NF, et al. GATA factors regulate proliferation, differentiation, and  
858 gene expression in small intestine of mature mice. *Gastroenterology*.  
859 2011;140(4):1219-29 e1-2. doi: 10.1053/j.gastro.2011.01.033. PubMed PMID:  
860 21262227; PubMed Central PMCID: PMC3541694.
- 861 63. Tetteh PW. Plasticity of intestinal epithelial cells in regeneration and  
862 cancer. Utrecht University; 2015.
- 863 64. Ritsma L, Ellenbroek SIJ, Zomer A, Snippert HJ, de Sauvage FJ,  
864 Simons BD, et al. Intestinal crypt homeostasis revealed at single-stem-cell  
865 level by in vivo live imaging. *Nature*. 2014;507(7492):362-5. Epub 2014/02/18.  
866 doi: 10.1038/nature12972. PubMed PMID: 24531760; PubMed Central  
867 PMCID: PMCPMC3964820.
- 868 65. Klymenko T, Muller J. The histone methyltransferases Trithorax and  
869 Ash1 prevent transcriptional silencing by Polycomb group proteins. *EMBO*  
870 *Rep*. 2004;5(4):373-7. doi: 10.1038/sj.embor.7400111. PubMed PMID:  
871 15031712; PubMed Central PMCID: PMC1299022.
- 872 66. Douillet D, Sze CC, Ryan C, Piunti A, Shah AP, Ugarenko M, et al.  
873 Uncoupling histone H3K4 trimethylation from developmental gene expression  
874 via an equilibrium of COMPASS, Polycomb and DNA methylation. *Nat Genet*.  
875 2020;52(6):615-25. Epub 2020/05/13. doi: 10.1038/s41588-020-0618-1.  
876 PubMed PMID: 32393859.
- 877 67. Bledau AS, Schmidt K, Neumann K, Hill U, Ciotta G, Gupta A, et al.  
878 The H3K4 methyltransferase Setd1a is first required at the epiblast stage,  
879 whereas Setd1b becomes essential after gastrulation. *Development*.  
880 2014;141(5):1022-35. doi: 10.1242/dev.098152. PubMed PMID: 24550110.
- 881 68. Anastassiadis K, Glaser S, Kranz A, Berhardt K, Stewart AF. A  
882 practical summary of site-specific recombination, conditional mutagenesis,  
883 and tamoxifen induction of CreERT2. *Methods Enzymol*. 2010;477:109-23.  
884 Epub 2010/08/12. doi: 10.1016/s0076-6879(10)77007-5. PubMed PMID:  
885 20699139.
- 886 69. Gregorieff A, Clevers H. In Situ Hybridization to Identify Gut Stem  
887 Cells. *Curr Protoc Stem Cell Biol*. 2015;34:2F 1 -2F 1 11. doi:  
888 10.1002/9780470151808.sc02f01s34. PubMed PMID: 26237569.
- 889 70. Nefzger CM, Jarde T, Rossello FJ, Horvay K, Knaupp AS, Powell DR,  
890 et al. A Versatile Strategy for Isolating a Highly Enriched Population of  
891 Intestinal Stem Cells. *Stem Cell Reports*. 2016;6(3):321-9. Epub 2016/03/01.

892 doi: 10.1016/j.stemcr.2016.01.014. PubMed PMID: 26923822; PubMed  
893 Central PMCID: PMCPMC4788784.  
894 71. Huang da W, Sherman BT, Lempicki RA. Systematic and integrative  
895 analysis of large gene lists using DAVID bioinformatics resources. Nat Protoc.  
896 2009;4(1):44-57. doi: 10.1038/nprot.2008.211. PubMed PMID: 19131956.  
897 72. Subramanian A, Tamayo P, Mootha VK, Mukherjee S, Ebert BL,  
898 Gillette MA, et al. Gene set enrichment analysis: a knowledge-based  
899 approach for interpreting genome-wide expression profiles. Proc Natl Acad  
900 Sci U S A. 2005;102(43):15545-50. Epub 2005/10/04. doi:  
901 10.1073/pnas.0506580102. PubMed PMID: 16199517; PubMed Central  
902 PMCID: PMCPMC1239896.  
903 73. Livak KJ, Schmittgen TD. Analysis of relative gene expression data  
904 using real-time quantitative PCR and the 2(-Delta Delta C(T)) Method.  
905 Methods. 2001;25(4):402-8. doi: 10.1006/meth.2001.1262. PubMed PMID:  
906 11846609.  
907  
908

909 **Figure captions**

910

911 **Fig 1. Loss of MLL1 in adult mice.** (A) Giemsa-stained sections from the  
912 femur of  $MLL1^{FC/+; RC/+}$  and  $MLL1^{FC/FC; RC/+}$  mice. Two weeks after the last  
913 tamoxifen gavage mice were sacrificed and the femurs were dissected,  
914 decalcified, sectioned and stained. Bone marrow cellularity was severely  
915 decreased in  $MLL1^{FC/FC; RC/+}$  mice. Scale bar 100  $\mu$ m. (B) Kaplan-Meier survival  
916 curve. The first day of tamoxifen gavage was day zero. All  $MLL1^{FC/+; RC/+}$  mice  
917 (n=25) survived whereas all  $MLL1^{FC/FC; RC/+}$  mice (n=33) died within 33 days  
918 after tamoxifen induction with a median survival of 11 days. (C) Scheme of the  
919 experimental setup for bone marrow transplantation. Donor bone marrow from  
920 B6.SJL (CD45.1<sup>+</sup>) mice was transplanted into lethally irradiated  $MLL1^{F/+; RC/+}$   
921 and  $MLL1^{F/F; RC/+}$  recipients (CD45.2<sup>+</sup>). Blood chimerism (BC) was measured  
922 three times. After 30 weeks  $MLL1$  deletion was achieved by administrating  
923 tamoxifen (TAM). FACS analysis for KSL-Slam enriched HSCs (Kit<sup>+</sup> Sca1<sup>+</sup>  
924 Lin<sup>-</sup> CD48<sup>-</sup> CD150<sup>+</sup> CD34<sup>-</sup> CD135<sup>-</sup>) showed comparable numbers in BMTx  
925  $MLL1^{FC/+; RC/+}$  and  $MLL1^{FC/FC; RC/+}$  mice. Dot plots show Lin<sup>-</sup> CD48<sup>-</sup> CD150<sup>+</sup> CD34<sup>-</sup>  
926 CD135<sup>-</sup> gated bone marrow (BM) cells of indicated genotypes resolved for the  
927 expression of c-Kit and Sca-1. Donor and host cells are distinguished by  
928 surface markers CD45.1 and CD45.2. (D) Kaplan-Meier analysis for the onset  
929 of diarrhea. Tamoxifen was given by gavage for 6 days to  $MLL1^{F/+; RC/+}$  (n=6)  
930 and  $MLL1^{F/F; RC/+}$  (n=8). The first day of tamoxifen gavage was day zero. While  
931 all BMTx mice with the genotype  $MLL1^{FC/+; RC/+}$  remained healthy, all BMTx  
932  $MLL1^{FC/FC; RC/+}$  mice developed diarrhea with a median of 16.5 days. (E)  
933 Antibody staining (brown) showed that MLL1 is expressed in crypts of the

934 small and large intestine but absent in the villus (hematoxylin, purple). Scale  
935 bars are 50  $\mu\text{m}$ .

936

937 **Fig 2. *Mll1* deletion in BMTx mice leads to loss of stem and proliferating**

938 **cells and increased goblet cells.** (A) Antibody stainings showed reduced

939 MLL1, OLFM4 and SOX9 expression in BMTx *Mll1*<sup>FC/FC; RC/+</sup> intestine

940 compared to controls. Hematoxylin was used as a counterstain for MLL1 and

941 OLFM4 immunohistochemistry (IHC). Expression of Ki67, a marker for

942 proliferating cells was reduced in BMTx *Mll1*<sup>FC/FC; RC/+</sup> mutant intestinal

943 sections. Arrowheads point toward proliferating ISCs. Alcian blue was used as

944 a counterstain for SOX9 and Ki67 IHC, which also revealed enlarged goblet

945 cells (turquoise) in the crypts of BMTx *Mll1*<sup>FC/FC; RC/+</sup> sections. Scale bars are

946 50  $\mu\text{m}$ . (B) PAS stain to examine goblet cells in villi and crypts of BMTx

947 intestine. Black arrowheads point towards vacuolar structures. Yellow

948 arrowhead points to a mislocalized goblet cell in BMTx *Mll1*<sup>FC/FC; RC/+</sup> crypt.

949 Left panels scale bar 100  $\mu\text{m}$ ; middle panels scale bar 50  $\mu\text{m}$ . GOB5 antibody

950 staining of BMTx *Mll1*<sup>FC/FC; RC/+</sup> intestinal sections. Right panels scale bar 100

951  $\mu\text{m}$ . (C) Left panels; lysozyme antibody staining reveals that Paneth cell

952 numbers remain unchanged. Arrowheads point at Paneth cells. Alcian blue

953 was used as a counterstain and marks goblet cells (turquoise). Middle panels;

954 chromogranin A antibody stain, arrowheads point to the sparse

955 enteroendocrine cells (dark brown) in the villi. Right panels; red enterocytes

956 covering the villi were visualized by alkaline phosphatase staining.

957 Hematoxylin was used as a counterstain for chromogranin A IHC and alkaline

958 phosphatase histochemical staining. Scale bars are 50  $\mu\text{m}$ .

959 **Fig 3. Decreased ISCs and increased goblet cells after intestinal specific**  
960 **loss of MLL1.** (A) Percent of weight loss of *Mll1*<sup>FC/+; Vil-Cre-ERT2/+</sup> (n=5) and of  
961 *Mll1*<sup>FC/FC; Vil-Cre-ERT2/+</sup> (n=9) mice. Mean ± s.d. is shown (p=0.029, Student's *t*-  
962 test). (B) Decrease in ISC markers, OLFM4 and SOX9 in *Mll1*<sup>FC/FC; Vil-Cre-ERT2/+</sup>  
963 intestinal sections. SOX9<sup>+</sup> ISCs in *Mll1*<sup>FC/+; Vil-Cre-ERT2/+</sup> intestinal sections are  
964 marked with red arrowheads. Proliferating cells in the TA compartment as well  
965 as proliferative ISCs (arrowhead) are reduced in *Mll1*<sup>FC/FC; Vil-Cre-ERT2/+</sup> sections.  
966 Alcian blue was used as a counterstain after staining for SOX9 and Ki67 and  
967 marks goblet cells (turquoise). Scale bars are 100 μm for OLFM4 and 50 μm  
968 for SOX9 and Ki67. (C) Left panels; alcian blue staining of goblet cells with  
969 nuclear fast red (NFR) to stain nuclei. Middle panels; Paneth cells visualized  
970 by staining of granules containing lysozyme (arrowheads). Right panels;  
971 enteroendocrine cells stained with chromogranin A antibody (brown;  
972 arrowheads) in the villi. Scale bars are 100 μm.

973

974 **Fig 4. RNA profiling of *Mll1*<sup>FC/FC; Lgr5-eGFP-CreERT2/+</sup> and control ISCs.** (A)  
975 ISCs were sorted from control (*Mll1*<sup>FC/+; Lgr5-eGFP-CreERT2/+</sup>) (n=4) and *Mll1*<sup>FC/FC;</sup>  
976 *Lgr5-eGFP-CreERT2/+ (n=4) mice 4 days after tamoxifen induction was completed  
977 and subjected to RNA profiling. MA plot visualizing the log2-fold change  
978 differences according to expression levels of ISCs. Red dots represent  
979 significant DEGs at a 5% FDR. *Jaml* is the top downregulated gene. (B) Plots  
980 show biological processes (BP) that are enriched in genes up- or  
981 downregulated in *Mll1*<sup>FC/FC; Lgr5-eGFP-CreERT2/+</sup> compared to control ISCs.  
982 Analysis was performed using the gene ontology (GO)/BP/FAT database of  
983 DAVID 6.8. (C) (D) GSEA shows significant negative or positive correlation of*



984 genes from the stem (C) and goblet cell (D) signature gene set in *Mll1*<sup>FC/FC</sup>;  
985 *Lgr5-eGFP-CreERT2/+* compared to control ISCs (4 days after tamoxifen). The  
986 signature gene sets originate from [44]. NES: normalized enrichment score.  
987 (E) DESeq normalized counts for genes coding for transcription factors  
988 downregulated in *Mll1*<sup>FC/FC</sup>; *Lgr5-eGFP-CreERT2/+* compared to control ISCs (4 days  
989 after tamoxifen). Mean+s.d. is shown; n=4; p<0.05, Wald test. (F) DESeq  
990 normalized counts for genes coding for ISC markers downregulated in  
991 *Mll1*<sup>FC/FC</sup>; *Lgr5-eGFP-CreERT2/+* compared to control ISCs (4 days after tamoxifen).  
992 Mean+s.d. is shown; n=4; p<0.05, Wald test (G) DESeq normalized counts for  
993 genes coding for goblet cell markers upregulated in *Mll1*<sup>FC/FC</sup>; *Lgr5-eGFP-CreERT2/+*  
994 compared to control ISCs (4 days after tamoxifen). Mean+s.d. is shown; n=4;  
995 p<0.05, Wald test.

996

997 **Fig 5. RNA profiling of wt Paneth cells after deletion of *Mll1* in the**

998 **neighboring ISCs. (A) Wt Paneth cells neighboring either *Mll1*<sup>FC/+</sup>; *Lgr5-eGFP-***

999 ***CreERT2/+* or *Mll1*<sup>FC/FC</sup>; *Lgr5-eGFP-CreERT2/+* ISCs were sorted 4 days after tamoxifen**

1000 induction was completed and were subjected to RNA profiling. MA plot

1001 visualizing the log<sub>2</sub>-fold change differences according to expression levels of

1002 Paneth cells. Red dots represent significant DEGs at a 5% FDR. (B) Enriched

1003 terms of biological processes and pathways down- and upregulated using

1004 DAVID GO/BP/FAT and KEGG database. (C) GSEA shows significant

1005 negative or positive correlation of genes from the GO ERAD pathway, GO

1006 oxidative phosphorylation and Paneth cell signature gene set in wt Paneth

1007 cells neighboring either *Mll1*<sup>FC/FC</sup>; *Lgr5-eGFP-CreERT2/+* or *Mll1*<sup>FC/+</sup>; *Lgr5-eGFP-CreERT2/+*

1008 ISCs. The Paneth cell signature gene set originates from [44]. NES:

1009 normalized enrichment score. (D) DESeq normalized counts for selected  
1010 genes differentially regulated in the ERAD pathway, oxidative phosphorylation  
1011 and Paneth cell signature gene set. Mean+s.d. is shown; n=4; p<0.05, Wald  
1012 test.

1013

1014 **Fig 6. *Mll1* deletion in organoids results in formation of spheres.** (A)

1015 Differential interference contrast (DIC) images of *Mll1*<sup>FC/+; RC/+</sup> and *Mll1*<sup>FC/FC;</sup>  
1016 <sup>RC/+</sup> organoids. Organoids were induced with 4-OH tamoxifen for 24 h. Upon

1017 passaging (P), the mutant starts to lose its budding morphology giving rise to  
1018 an undifferentiated cyst-like appearance. Scale bar 100 μm. (B) Genotyping of

1019 organoids/spheres for *Mll1* at passage 2. After tamoxifen induction the *Mll1*<sup>F</sup>  
1020 allele recombines and results in the *Mll1*<sup>FC</sup> allele. PCR primers located  
1021 upstream of the 5' FRT site and downstream of the 3' loxP site (see S1A Fig)

1022 identify the respective band. Consequently, the *Mll1*<sup>F</sup> band is 1084 bp, the wt  
1023 band is 933 bp and the *Mll1*<sup>FC</sup> band is 186 bp. An additional PCR was

1024 performed with primers flanking the 3' loxP site. Consequently, the *Mll1*<sup>F</sup> band  
1025 is 297 bp and the wt band is 251 bp. (C) Quantification of organoids and

1026 spheres shown in A. (D) qRT-PCR was performed for selected genes on

1027 cDNA from *Mll1*<sup>FC/+; RC/+</sup> and *Mll1*<sup>FC/FC; RC/+</sup> organoid culture. Mean+s.d. is  
1028 shown; n=3; \*p<0.05, \*\*p<0.01, \*\*\*p<0.001, Student's *t* test.

1029

1030 **Fig 7. Cell-cell contacts are essential for cell identity.** JAML is an integral

1031 transmembrane protein expressed on ISCs and interacts with unknown

1032 proteins on Paneth cells. Loss of MLL1 in ISCs causes loss of JAML mediated



1033 interactions, transcriptional changes and subsequently loss of stem and  
1034 Paneth cell identity.

1035 **Supporting information**

1036

1037 **S1 Fig. *Mll1* gene targeting, embryonic phenotype and aspects of**

1038 **expression. (A)** Diagram of the *Mll1* gene with numbered exons and the

1039 multipurpose allele (*Mll1<sup>A</sup>*). This allele is converted to *Mll1<sup>F</sup>* upon FLP

1040 recombination. Cre recombination leads to excision of the frameshifting exon

1041 2 generating the conditional mutant allele (*Mll1<sup>FC</sup>*). Genotyping primers are

1042 depicted for the downstream loxP site (loxP1 – loxP2) and for Flp

1043 recombination (Flp se – loxP2). SA = splice acceptor, IRES = internal

1044 ribosome entry site, pA = polyadenylation signal, lacZ-neo =  $\beta$ -galactosidase

1045 and neomycin resistance gene, \* depicts premature stop codon. **(B)**

1046 Schematic representation of the Southern blot strategy. For identifying correct

1047 targeted events in the *Mll1* locus, Southern blot analysis employed 5' (blue

1048 box) and 3' (red box) probes. **(C)** Southern blot analysis using 5' and 3'

1049 external probes. **(D)** Dissected embryos from *Mll1<sup>A/+</sup>* intercrosses at E12.5.

1050 *Mll1<sup>A/A</sup>* embryos had a pale liver (marked by arrow). **(E)** Antibody staining

1051 (brown) shows that MLL1 is expressed in crypts and TA compartment of the

1052 small intestine but is absent in the villus (hematoxylin, purple). Scale bar 50

1053  $\mu$ m. **(F)** Normalized RNA-sequence counts for *Mll1/Kmt2a*, *Mll2/Kmt2b*,

1054 *Mll3/Kmt2c*, *Mll4/Kmt2d*, *Setd1a/Kmt2f* and *Setd1b/Kmt2g* in ISCs (eGFP<sup>high</sup>)

1055 and Paneth cells sorted from *Lgr5-eGFP-CreERT2* mice. Mean+s.d. is shown;

1056 n=4; \*p<0.05, \*\*p<0.01, \*\*\*p<0.001, \*\*\*\*p<0.0001, Student's *t* test. **(G)**

1057 Antibody stainings of H3K4me1, H3K4me2 and H3K4me3 are comparable in

1058 *Mll1<sup>FC/+; RC/+</sup>* and *Mll1<sup>FC/FC; RC/+</sup>* intestinal sections. Scale bars are 100  $\mu$ m.

1059

1060 **S2 Fig. Without bone marrow transplantation, *Mll1* deletion recapitulates**  
1061 **the BMTx *Mll1* mutant phenotype. (A)** Antibody stain (left panels) and *in situ*  
1062 hybridization (right panels) to visualize OLFM4/*Olfm4* in intestinal sections.  
1063 Arrowheads point towards ISCs. Scale bar 100  $\mu$ m. **(B)** Proliferative activity  
1064 visualized by both Ki67 stain and BrdU incorporation in intestinal sections.  
1065 Arrowheads point towards proliferative ISCs. Scale bars are 50  $\mu$ m. **(C)** PAS  
1066 staining and GOB5 antibody stain to visualize goblet cells in intestinal  
1067 sections. Scale bars are 100  $\mu$ m. **(D)** Chromogranin A and alkaline  
1068 phosphatase staining to visualize enteroendocrine cells and enterocytes  
1069 respectively. Arrows point to enteroendocrine cells (brown cytoplasmic stain)  
1070 in the villi. Blue enterocytes covering the villi are marked by arrowheads.  
1071 Scale bars are 100  $\mu$ m for chromogranin A and 50  $\mu$ m for alkaline  
1072 phosphatase. **(E)** Nuclear  $\beta$ -catenin is comparable between the two different  
1073 genotypes. Arrowheads point at  $\beta$ -catenin positive nuclei. Scale bar is 50  $\mu$ m.

1074

1075 **S3 Fig. FACS gating strategy to sort ISCs and Paneth cells.** Flow sorting  
1076 on **(A)** *Mll1*<sup>FC/+</sup>; *Lgr5-eGFP-CreERT2*<sup>+</sup> and **(B)** *Mll1*<sup>FC/FC</sup>; *Lgr5-eGFP-CreERT2*<sup>+</sup> single cell  
1077 suspension of crypts. Briefly, the consecutive gating steps were applied: (i) –  
1078 (iii) Definition of the population of interest by exclusion of debris based on size  
1079 (FSC), granularity (SSC) and the selection for single cells; (iv) Exclusion of  
1080 dead cells that incorporated the nucleic acid stain SYTOX blue; (v) Depletion  
1081 of CD45<sup>pos</sup> population; (vi) Definition of Paneth (EpCAM<sup>high</sup>/CD24<sup>high</sup>) cell  
1082 population by plotting EpCAM vs CD24 fluorescence; (vii) EpCAM<sup>high</sup>/CD24<sup>med</sup>  
1083 cell population was gated to discriminate the stem cell population (GFP<sup>high</sup>).  
1084 **(C)** Stem cells (SC) and Paneth cells (PC) from *Mll1*<sup>FC/+</sup>; *Lgr5-eGFP-CreERT2*<sup>+</sup> and

1085 *Mll1*<sup>FC/FC; Lgr5-eGFP-CreERT2/+</sup> mice 4 days after tamoxifen induction were checked  
1086 for recombination. Left panel; PCR genotyping was using primers upstream of  
1087 the 5' FRT site and downstream of the 3' loxP site identified the *Mll1*<sup>F</sup> band at  
1088 1084 bp, the wild type band a 933 bp and the *Mll1*<sup>FC</sup> band at 186 bp. Right  
1089 panel; primers flanking the 3' loxP site identified the *Mll1*<sup>F</sup> band at 297 bp and  
1090 the wild type band at 251 bp.

1091

1092 **S4 Fig. Alignment and quality of the sequenced data. (A)** ISCs and  
1093 Paneth cells were analyzed from control (*Mll1*<sup>FC/+; Lgr5-eGFP-CreERT2/+</sup>) (ctrl) (n=4)  
1094 and *Mll1*<sup>FC/FC; Lgr5-eGFP-CreERT2/+</sup> (n=4) (KO) mice. Mappability of reads for sorted  
1095 ISCs 4 days after tamoxifen induction was completed. **(B)** Mappability of  
1096 reads for sorted Paneth cells 4 days after tamoxifen induction was completed.  
1097 **(C)** Mappability of reads for sorted ISCs 10 days after tamoxifen induction was  
1098 completed. ISCs were analyzed from control (*Mll1*<sup>FC/+; Lgr5-eGFP-CreERT2/+</sup>) (ctrl)  
1099 (n=4) and *Mll1*<sup>FC/FC; Lgr5-eGFP-CreERT2/+</sup> (n=3) (KO) mice. **(D)** Principal-component  
1100 analysis (PCA) was performed on Paneth cell and ISC samples sorted 4 days  
1101 after tamoxifen. PCA is based on mRNA changes for the top 500 most diverse  
1102 genes of stem cell (SC) and Paneth cell (PC) samples in comparison to  
1103 published datasets for Lgr5<sup>+</sup> SC [42] and CD24<sup>+</sup> PC [35].

1104

1105 **S5 Fig. ISCs lacking MLL1 loose their cellular identity. (A) (B)** GSEA  
1106 shows significant negative or positive correlation of genes from the stem (A)  
1107 and goblet cell (B) signature gene set in *Mll1*<sup>FC/FC; Lgr5-eGFP-CreERT2/+</sup> ISCs  
1108 compared to control ISCs 10 days after tamoxifen induction was completed.  
1109 The signature gene sets originate from [44]. NES: normalized enrichment

1110 score. **(C)** To validate RNA-seq results qRT-PCR was performed for selected  
1111 genes on cDNA from *Mll1*<sup>FC/+; Lgr5-eGFP-CreERT2/+</sup> and *Mll1*<sup>FC/FC; Lgr5-eGFP-CreERT2/+</sup>  
1112 sorted stem cells 4 days after tamoxifen induction was completed. Mean+s.d.  
1113 is shown; n=3; \*p<0.05, \*\*p<0.01, Student's *t* test. **(D)** DESeq normalized  
1114 counts demonstrate *Jaml* being highly expressed in Lgr5<sup>+</sup> ISCs but not in  
1115 Paneth cells. Mean+s.d. is shown; n=4; \*\*\*p<0.001, Student's *t* test.  
1116

Fig 1.

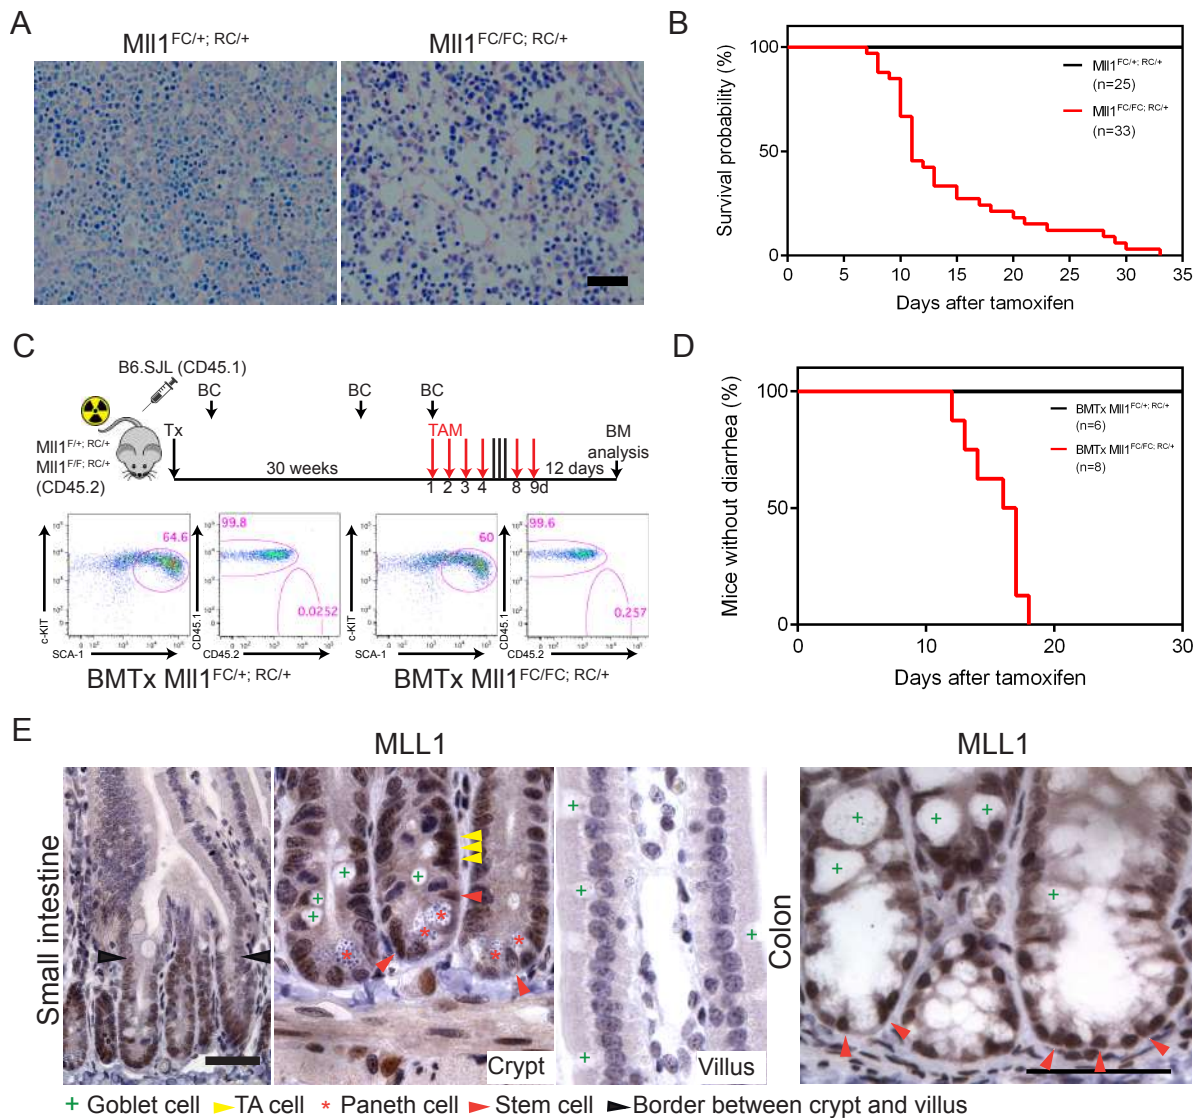



Fig 2.

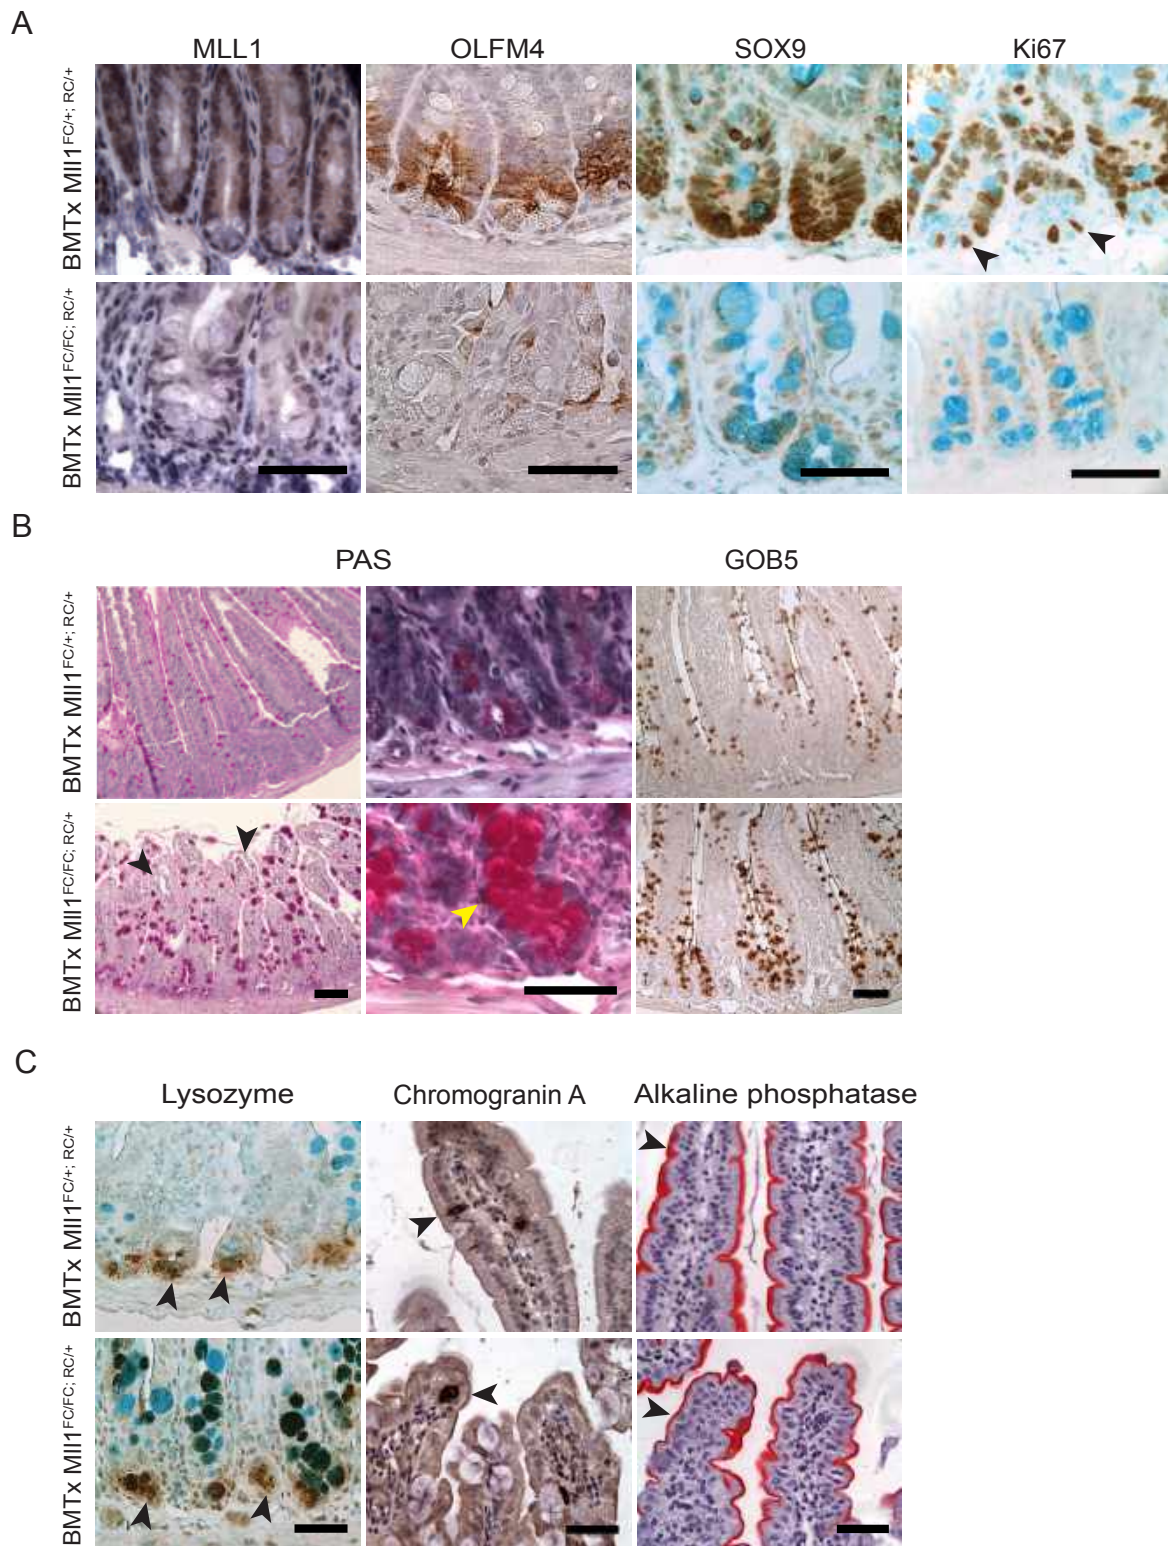

Fig 3.

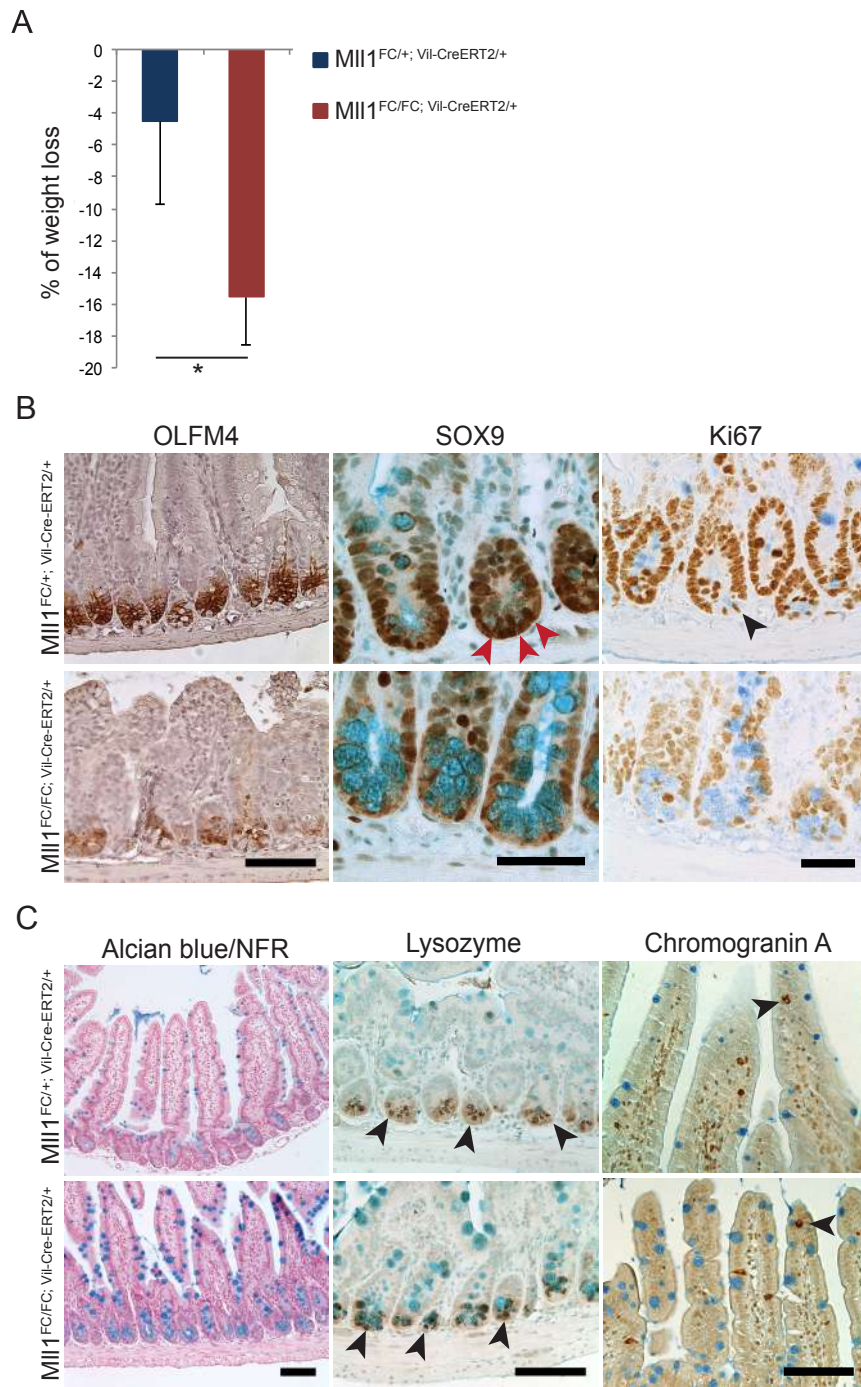



Fig 4.

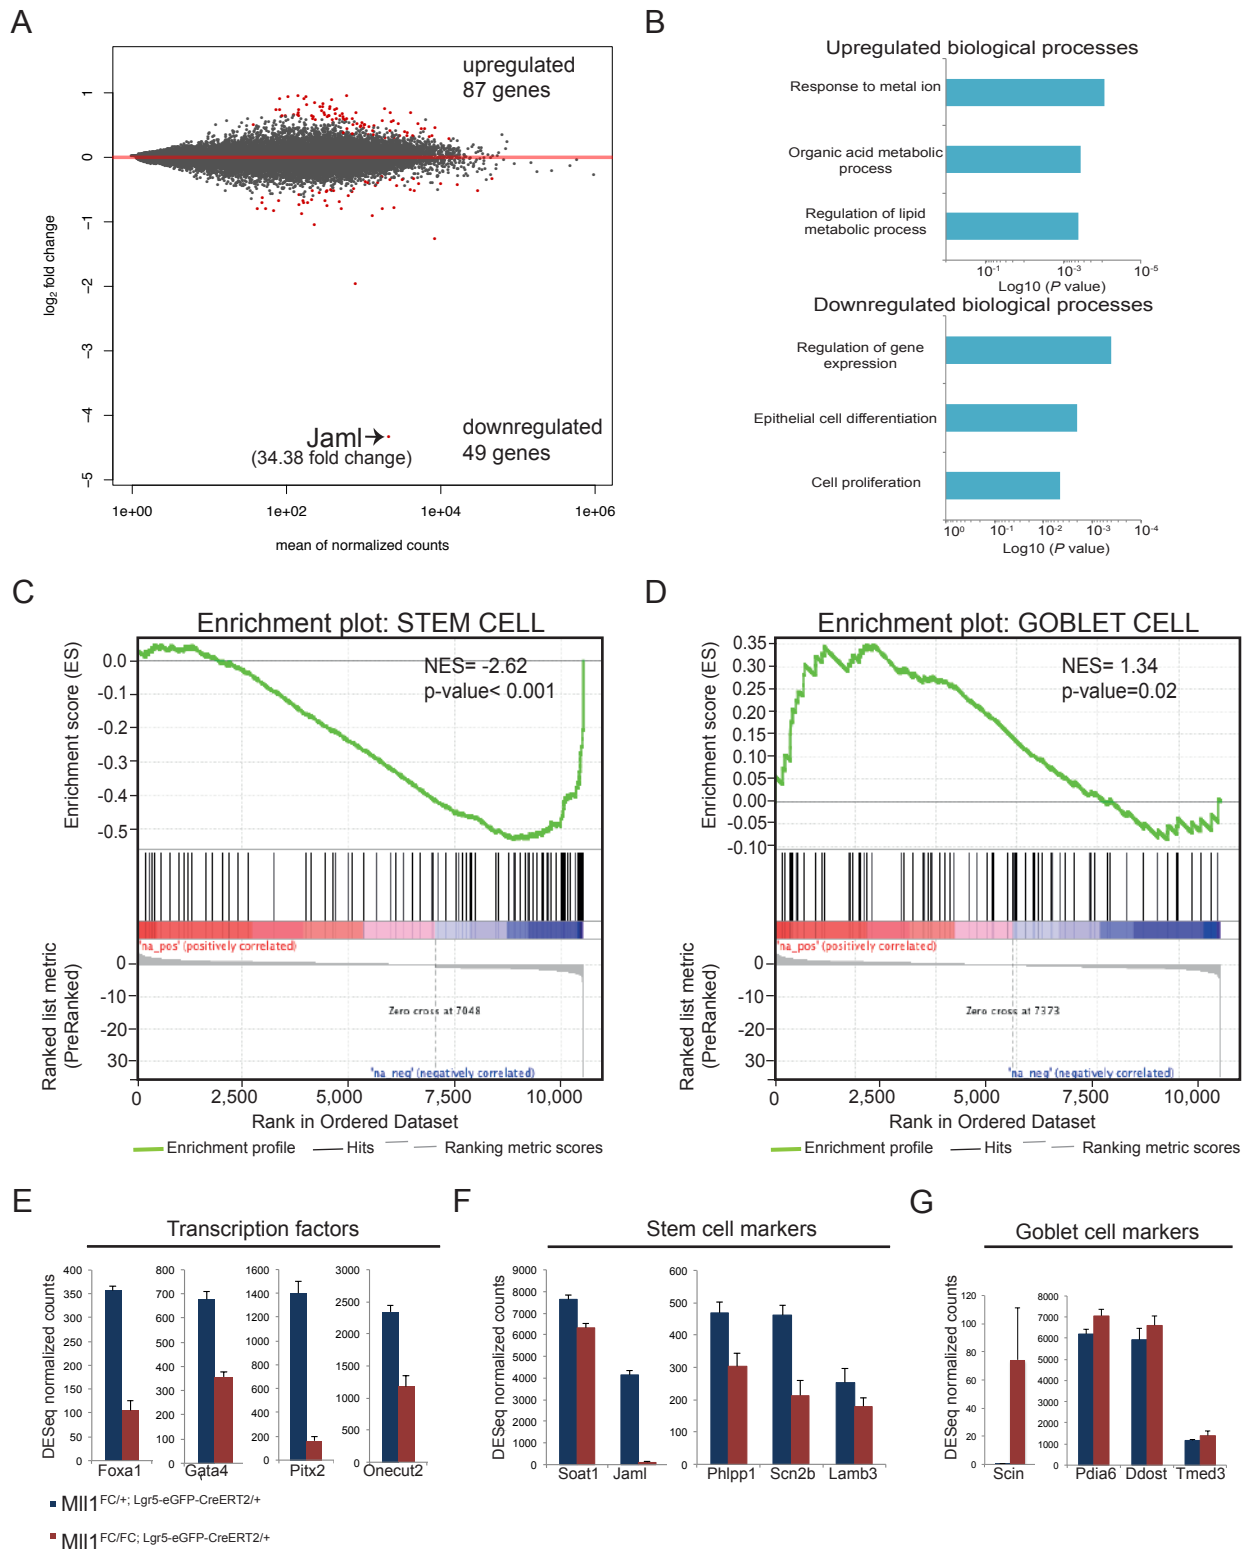

Fig 5.

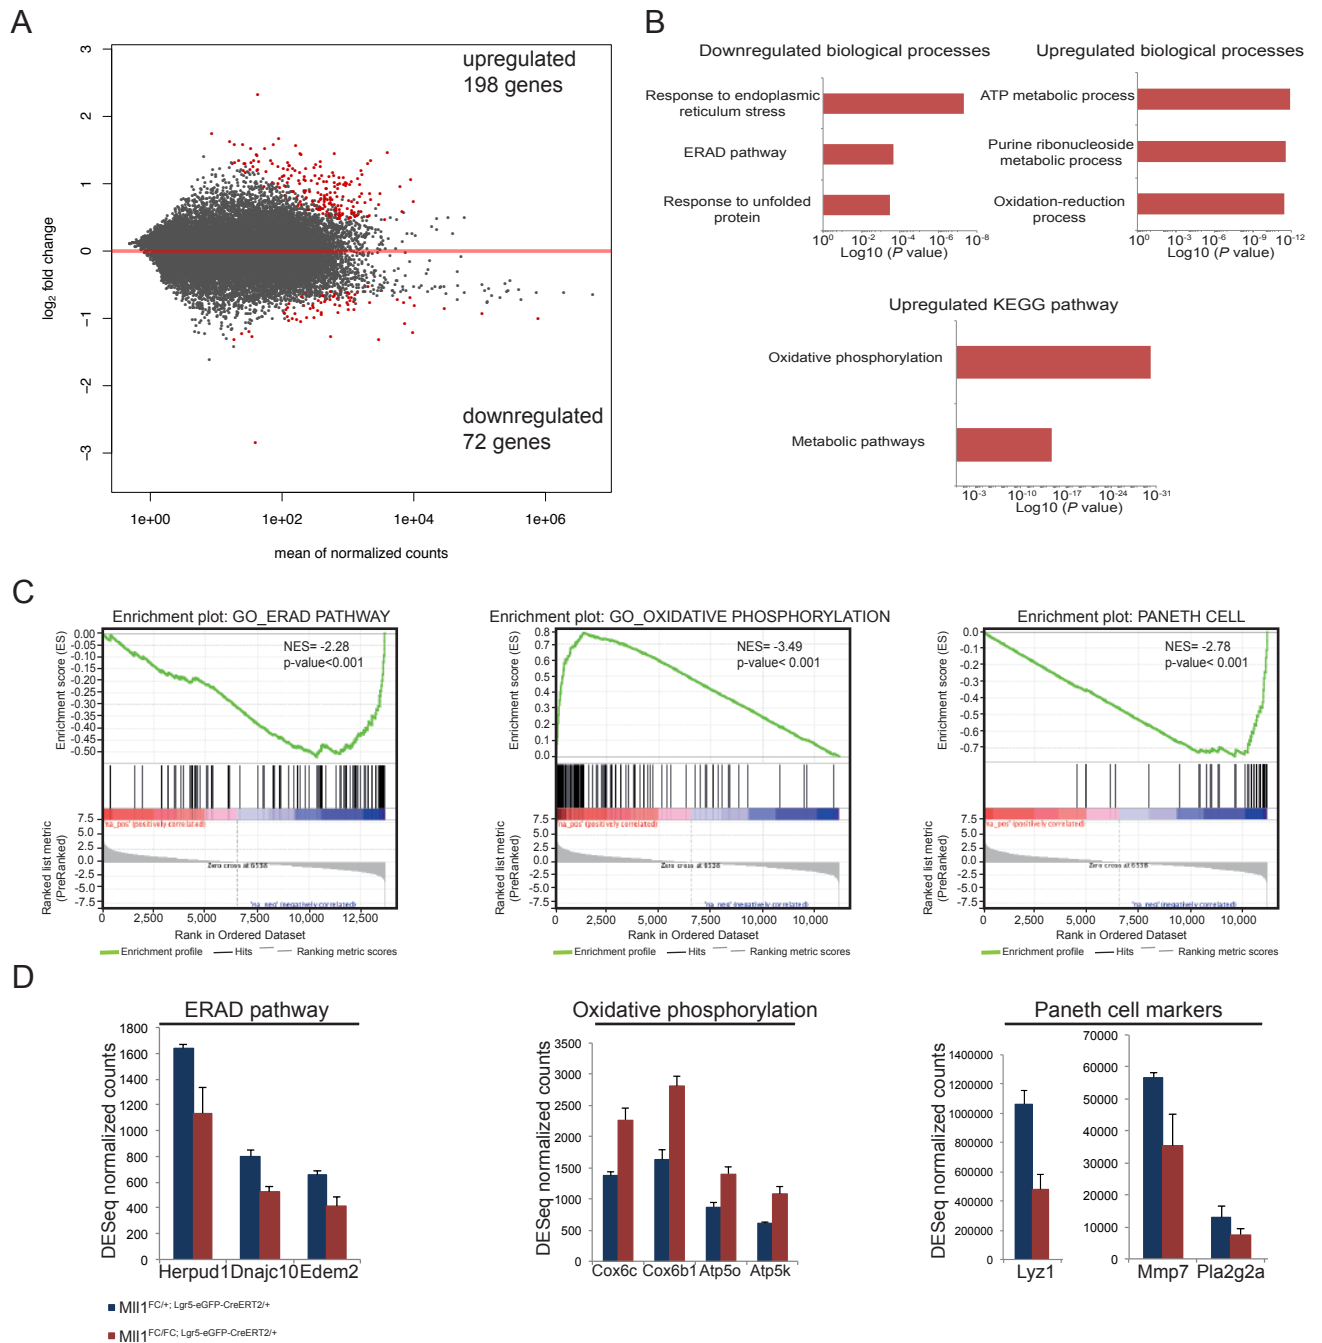

Fig 6.

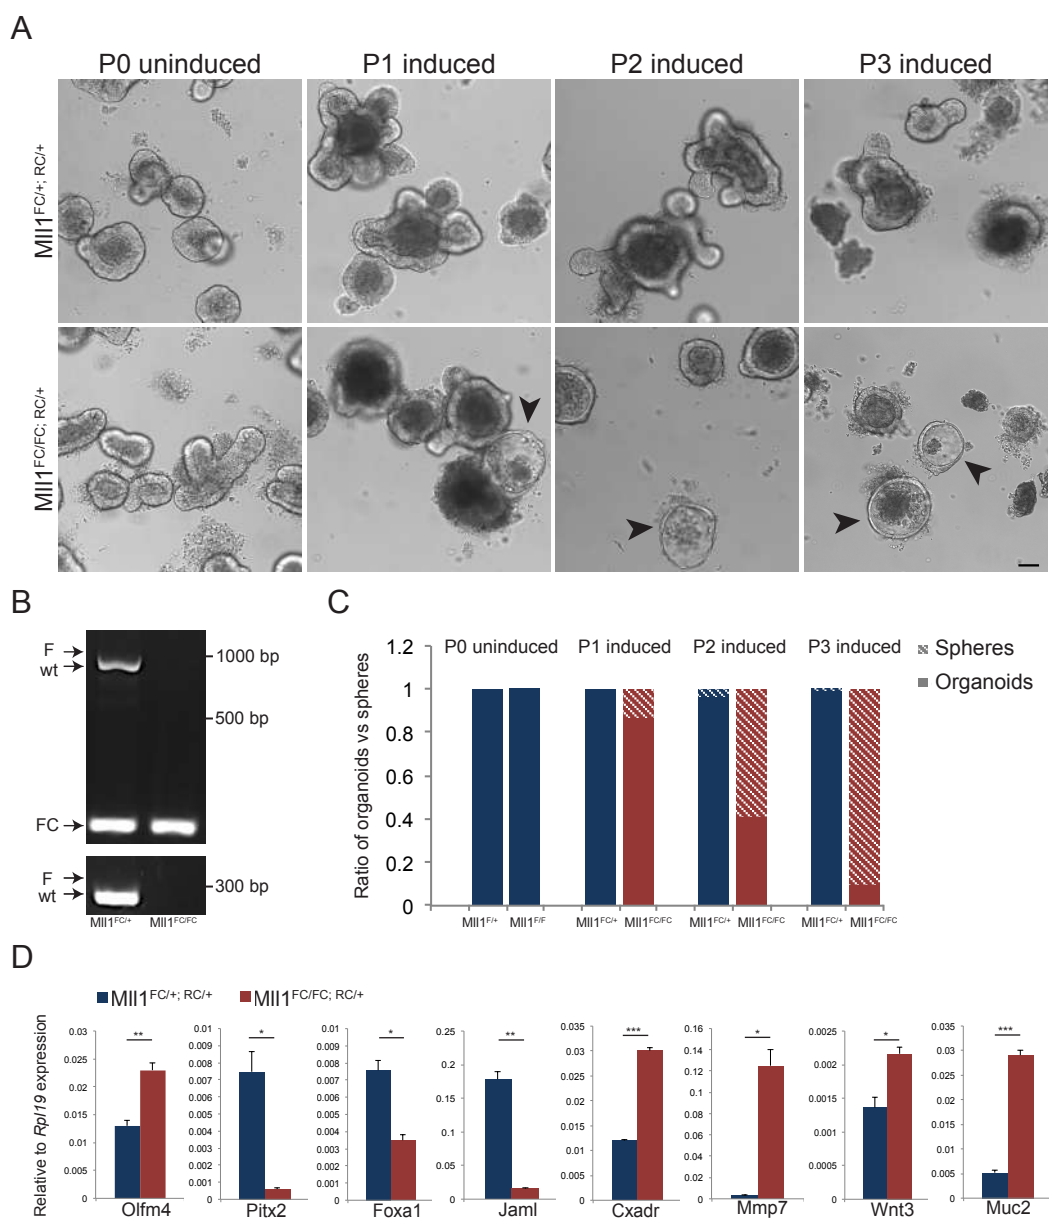

Fig 7.

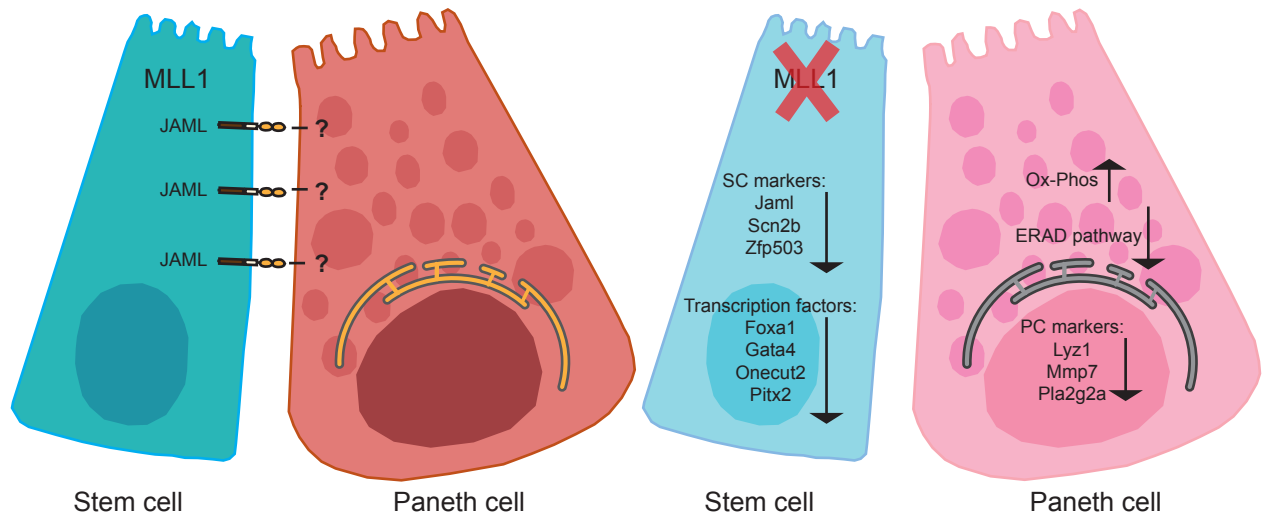

Source: https://biorxiv.org/content/10.1101/2020.11.19.389528v1.full.pdf
